# Supplementary material
Source: PubMed Central journal article supplement (PMC4698345)
Supplement: NIHMS743428-supplement-1.pdf [file NIHMS743428-supplement-1.pdf]

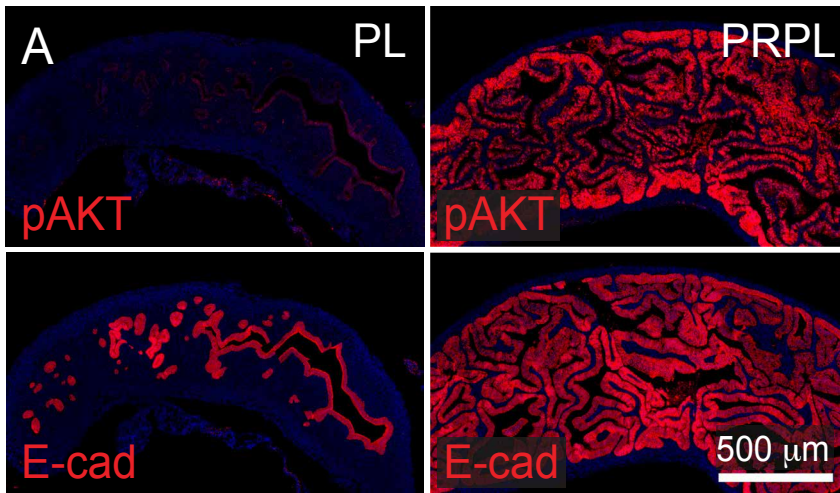

**B** Lymphoid gating

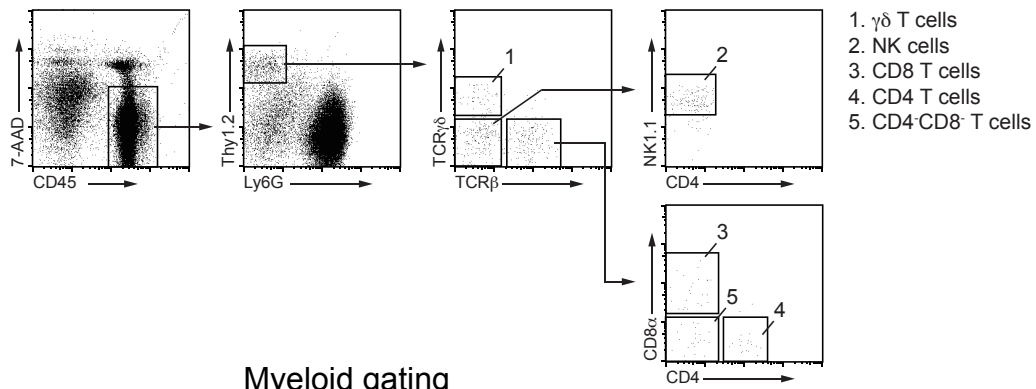

Myeloid gating

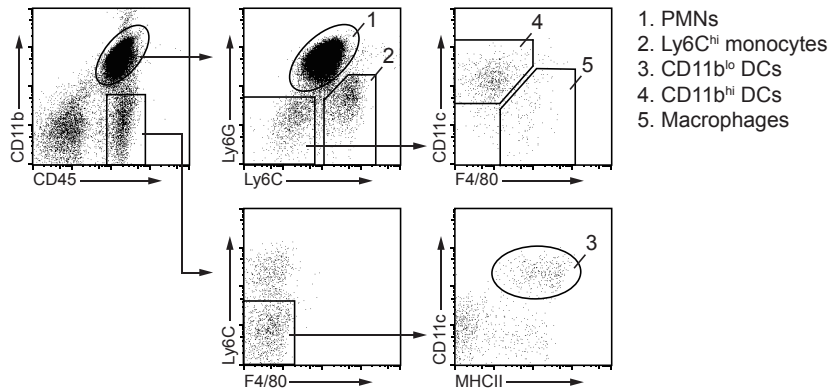

**C**

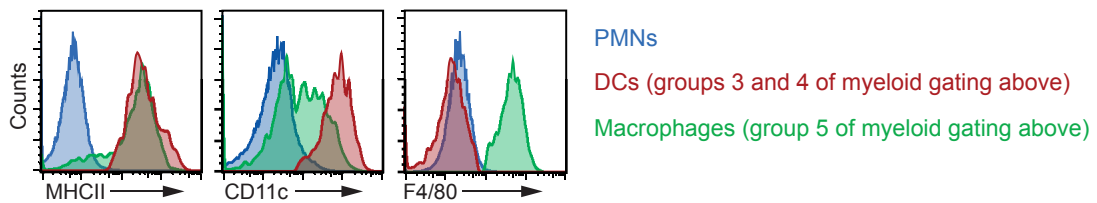

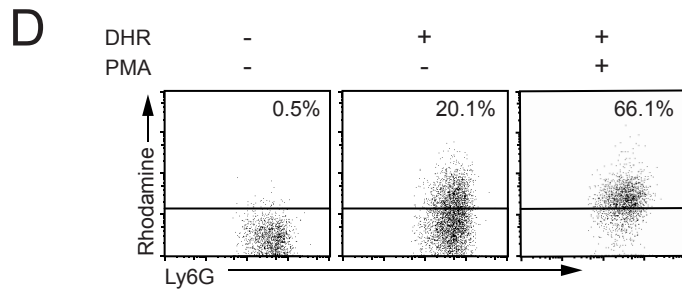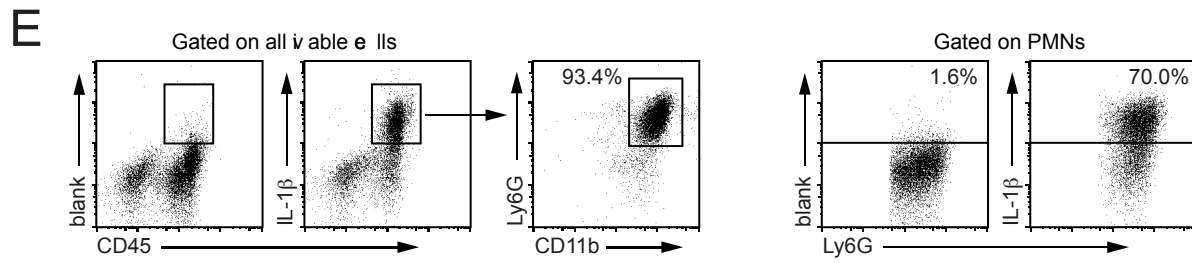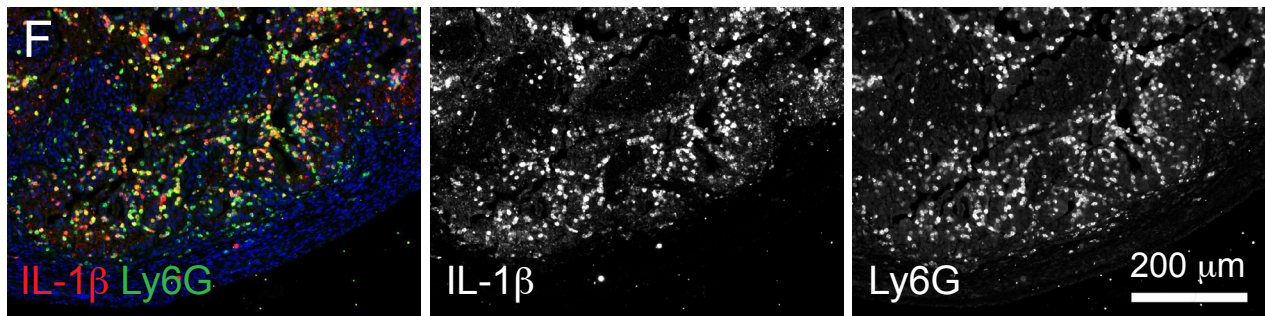

**Figure S1, related to Figure 1. Identification and characteristics of infiltrating PMNs in early stage PRPL uteri.** (A) PTEN inactivation throughout the PRPL uterine epithelium. Serial tissue sections of 2-week PL and PRPL uteri were stained with antibodies to phospho-AKT (pAKT; top) to identify cells with PTEN loss, or to E-cadherin (E-Cad; bottom) to visualize all uterine epithelial cells. Representative of n = 3 mice per group. (B) Gating strategies to identify uterine leukocyte subsets. The myeloid gating also involved use of 7-AAD to identify viable cells (not depicted). (C) Flow cytometric characteristics of uterine PMNs in comparison to uterine DCs and macrophages. (D) Reactive oxygen species (ROS) production by uterine PMNs. 4-week PRPL uterine cells were incubated for 30 min with or without dihydrorhodamine 123 (DHR), which in the presence of ROS becomes oxidized to the fluorescent compound rhodamine. Cells incubated with phorbol myristate acetate (PMA) served as a positive control for ROS production. Gated on CD45<sup>+</sup>7-AAD<sup>-</sup>CD11b<sup>+</sup>Ly6G<sup>+</sup> cells as in panel B. Representative of n = 5 mice. (E) IL-1 $\beta$  production by uterine leukocytes, as detected by intracellular cytokine staining of uterine cell suspensions. Note that virtually all IL-1 $\beta$ <sup>+</sup> cells within the total viable (7-AAD<sup>-</sup>) population are CD45<sup>+</sup>CD11b<sup>+</sup>Ly6G<sup>+</sup> PMNs (left) and that a large fraction of PMNs produce IL-1 $\beta$  (right). Representative of n = 5 mice. (F) Representative co-immunostaining of Ly6G<sup>+</sup> PMNs and IL-1 $\beta$  in 4-week PRPL uteri. Middle and right images show individual stains from the left panel. Most IL-1 $\beta$ <sup>+</sup> cells are PMNs (i.e. Ly6G<sup>+</sup> cells), though not all PMNs express IL-1 $\beta$ , consistent with the intracellular cytokine staining in panel E. Representative of n = 3 mice.

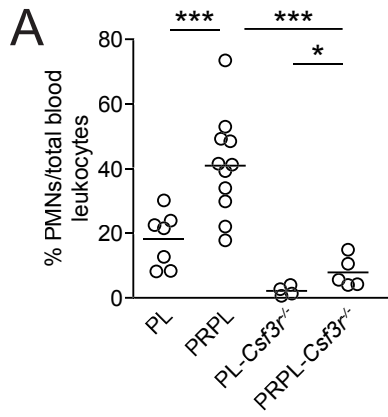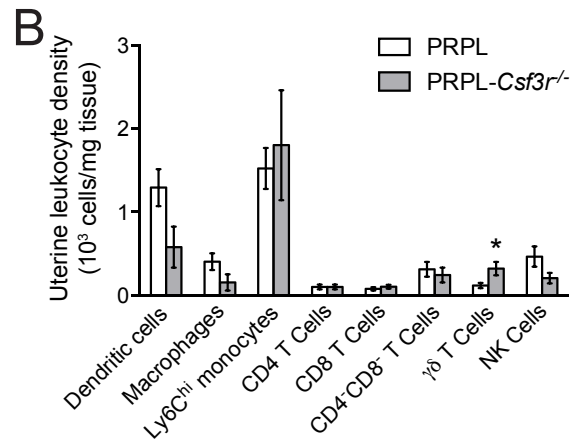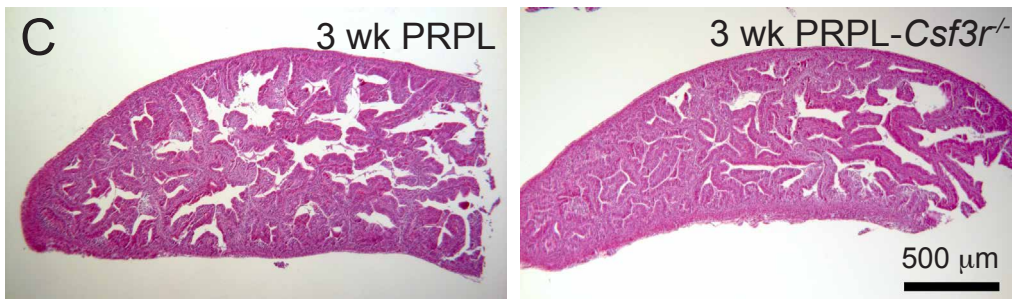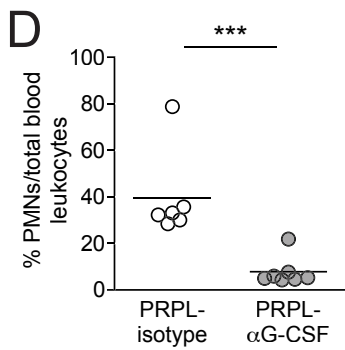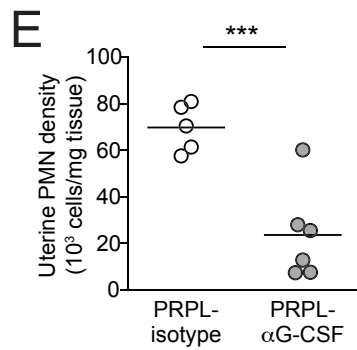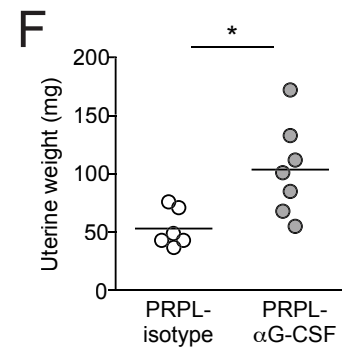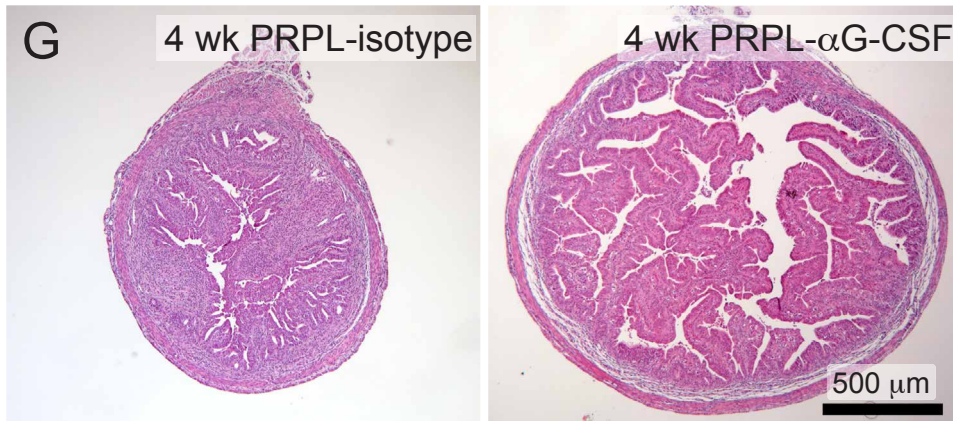



**Figure S2, related to Figure 2. Further characterization of PMN-depleted tumor-bearing uteri.** (A) PMN frequencies in the blood of 4-week-old mice. (B) Leukocyte subset densities in 4-week PRPL versus PRPL-*Csf3r*<sup>-/-</sup> uteri as determined by flow cytometry. Data show mean  $\pm$  SEM for  $n \geq 7$  mice per group. (C) Representative H&E stained longitudinal sections from 3-week uteri ( $n \geq 6$  mice per group). (D-G) Effect of antibody-mediated PMN depletion on blood PMN frequencies (D), uterine PMN densities (E), uterine weights (F), and uterine morphology (G; H&E staining). PMNs were depleted in PRPL mice by giving daily injections of G-CSF-neutralizing antibodies (PRPL- $\alpha$ G-CSF) from postnatal day 19 until sacrifice on day 28 while control mice were similarly treated with an isotype-matched antibody (PRPL-isotype). One of the mice with the most substantial depletion of PMNs provided the image shown in panel G. \* $p < 0.05$ ; \*\*\* $p < 0.005$ .





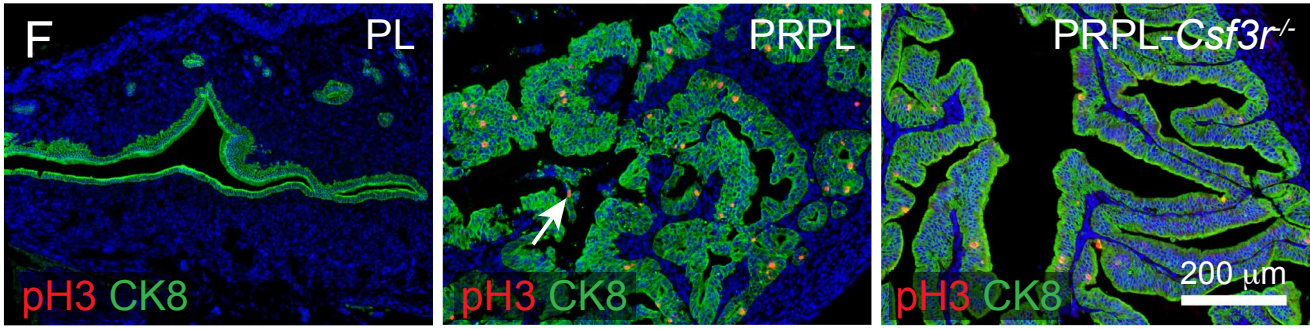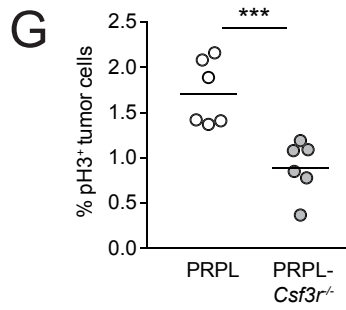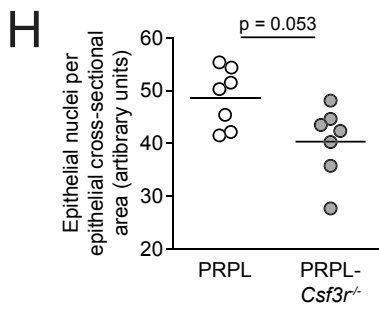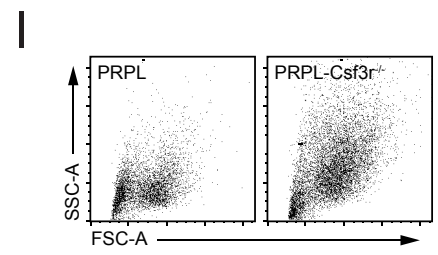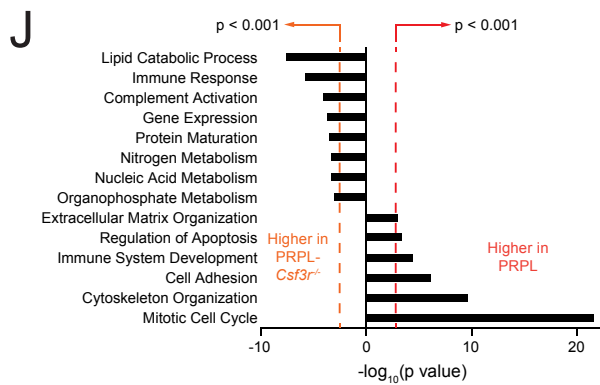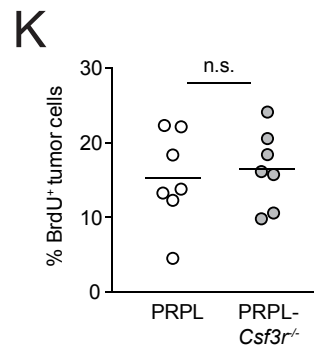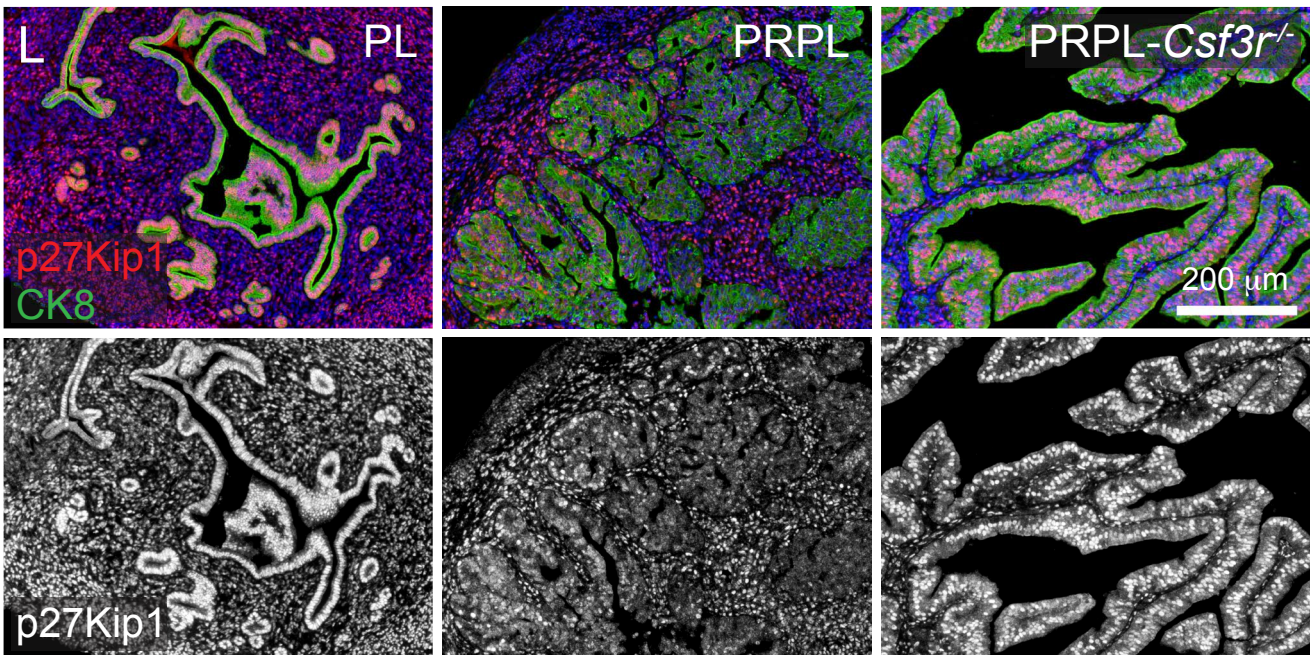

M

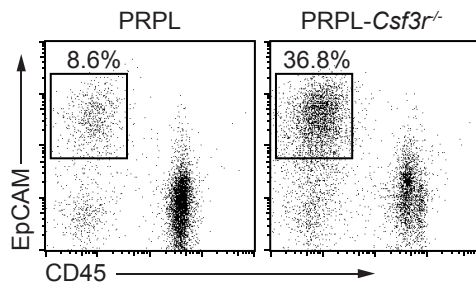

N

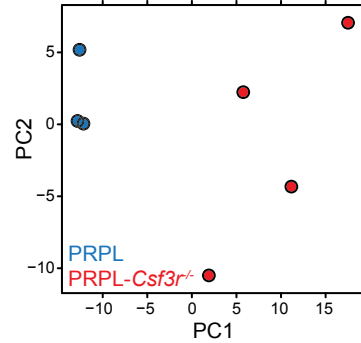

O

| Gene           | Gene Name                                                                                 | Fold | p-value  |
|----------------|-------------------------------------------------------------------------------------------|------|----------|
| <i>Ahctf1</i>  | AT hook containing transcription factor 1                                                 | 1.20 | 1.66E-02 |
| <i>Anln</i>    | Anillin, actin binding protein                                                            | 1.80 | 4.86E-04 |
| <i>Aspm</i>    | Abnormal spindle-like, microcephaly associated ( <i>Drosophila</i> )                      | 1.76 | 2.42E-04 |
| <i>Bub1</i>    | Budding uninhibited by benzimidazoles 1 homolog ( <i>S. cerevisiae</i> )                  | 1.45 | 1.46E-03 |
| <i>Bub1b</i>   | Budding uninhibited by benzimidazoles 1 homolog, beta ( <i>S. cerevisiae</i> )            | 1.33 | 3.62E-02 |
| <i>Ccna2</i>   | Cyclin A2                                                                                 | 1.39 | 1.61E-02 |
| <i>Ccnb1</i>   | Cyclin B1                                                                                 | 1.55 | 4.87E-05 |
| <i>Ccnb2</i>   | Cyclin B2                                                                                 | 1.25 | 4.99E-02 |
| <i>Ccnd1</i>   | Cyclin D1                                                                                 | 1.48 | 1.48E-02 |
| <i>Cdc25c</i>  | Cell division cycle 25 homolog C ( <i>S. pombe</i> )                                      | 1.37 | 3.74E-02 |
| <i>Cdca8</i>   | Cell division cycle associated 8                                                          | 1.28 | 4.05E-02 |
| <i>Cdk6</i>    | Cyclin-dependent kinase 6                                                                 | 1.54 | 3.50E-02 |
| <i>Cdkn2a</i>  | Cyclin-dependent kinase inhibitor 2A                                                      | 1.69 | 4.03E-02 |
| <i>Cenpe</i>   | Centromere protein E                                                                      | 1.46 | 7.50E-03 |
| <i>Cep55</i>   | Centrosomal protein 55                                                                    | 1.48 | 1.38E-02 |
| <i>Cit</i>     | Citron                                                                                    | 1.35 | 4.80E-02 |
| <i>Ckap5</i>   | Cytoskeleton associated protein 5                                                         | 1.38 | 8.09E-03 |
| <i>Cks1b</i>   | CDC28 protein kinase 1b                                                                   | 1.25 | 3.87E-02 |
| <i>Erc6l</i>   | Excision repair cross-complementing rodent repair deficiency complementation group 6-like | 1.50 | 5.88E-04 |
| <i>Kif11</i>   | Kinesin family member 11                                                                  | 1.65 | 4.18E-04 |
| <i>Kif20b</i>  | Kinesin family member 20B                                                                 | 1.42 | 1.36E-02 |
| <i>Kntc1</i>   | Kinetochores associated 1                                                                 | 1.36 | 3.76E-02 |
| <i>Lig1</i>    | Ligase I, DNA, ATP-dependent                                                              | 1.22 | 4.33E-02 |
| <i>Ncapd2</i>  | Non-SMC condensin I complex, subunit D2                                                   | 1.32 | 1.42E-02 |
| <i>Ncapg2</i>  | Non-SMC condensin II complex, subunit G2                                                  | 1.44 | 1.38E-02 |
| <i>Ncaph</i>   | Non-SMC condensin I complex, subunit H                                                    | 1.50 | 1.67E-03 |
| <i>Ndc80</i>   | NDC80 homolog, kinetochores complex component ( <i>S. cerevisiae</i> )                    | 1.42 | 2.73E-02 |
| <i>Nedd1</i>   | Neural precursor cell expressed, developmentally down-regulated gene 1                    | 1.35 | 8.95E-03 |
| <i>Nek2</i>    | Never in mitosis gene a-related expressed kinase 2                                        | 1.38 | 1.93E-02 |
| <i>Nsl1</i>    | NSL1, MIND kinetochores complex component, homolog ( <i>S. cerevisiae</i> )               | 1.42 | 3.46E-02 |
| <i>Nuf2</i>    | NUF2, NDC80 kinetochores complex component, homolog ( <i>S. cerevisiae</i> )              | 1.49 | 3.02E-04 |
| <i>Nup37</i>   | Nucleoporin 37                                                                            | 1.32 | 4.26E-02 |
| <i>Nusap1</i>  | Nucleolar and spindle associated protein 1                                                | 1.60 | 2.16E-03 |
| <i>Pard3</i>   | Partitioning defective 3 homolog ( <i>C. elegans</i> )                                    | 1.32 | 5.35E-03 |
| <i>Prc1</i>    | Protein regulator of cytokinesis 1                                                        | 1.53 | 3.11E-03 |
| <i>Racgap1</i> | Rac GTPase-activating protein 1                                                           | 1.31 | 2.00E-02 |
| <i>Rad21</i>   | RAD21 homolog ( <i>S. pombe</i> )                                                         | 1.21 | 3.32E-02 |
| <i>Sept11</i>  | Septin 11                                                                                 | 1.35 | 4.77E-02 |
| <i>Sept7</i>   | Septin 7                                                                                  | 1.16 | 3.07E-02 |
| <i>Sgol1</i>   | Shugoshin-like 1 ( <i>S. pombe</i> )                                                      | 1.40 | 2.55E-02 |
| <i>Sgol2</i>   | Shugoshin-like 2 ( <i>S. pombe</i> )                                                      | 1.32 | 2.36E-02 |
| <i>Ska1</i>    | Spindle and kinetochores associated complex subunit 1                                     | 1.51 | 1.14E-02 |
| <i>Smc1a</i>   | Structural maintenance of chromosomes 1A                                                  | 1.17 | 2.24E-02 |
| <i>Smc2</i>    | Structural maintenance of chromosomes 2                                                   | 1.50 | 2.17E-03 |
| <i>Smc4</i>    | Structural maintenance of chromosomes 4                                                   | 1.37 | 8.26E-03 |
| <i>Spag5</i>   | Sperm associated antigen 5                                                                | 1.39 | 7.78E-03 |
| <i>Stag1</i>   | Stromal antigen 1                                                                         | 1.27 | 1.07E-02 |
| <i>Tgfb2</i>   | Transforming growth factor, beta 2                                                        | 2.05 | 6.73E-06 |
| <i>Top2a</i>   | Topoisomerase (DNA) II alpha                                                              | 1.50 | 2.63E-03 |
| <i>Ube2c</i>   | Ubiquitin-conjugating enzyme E2C                                                          | 1.59 | 4.11E-04 |
| <i>Zwilch</i>  | Zwisch kinetochores protein                                                               | 1.31 | 4.42E-02 |



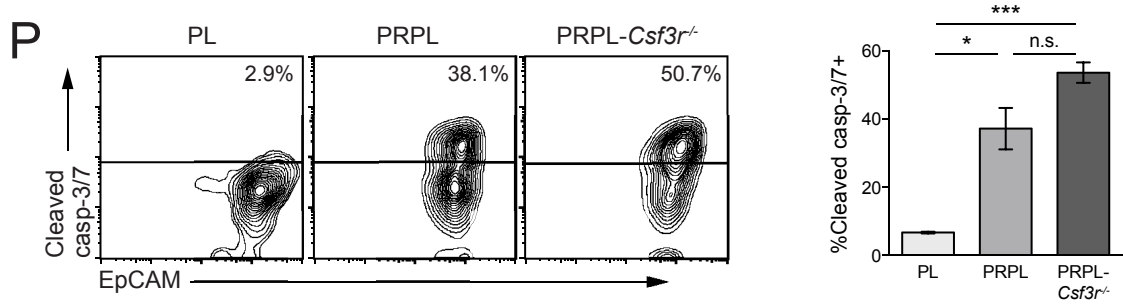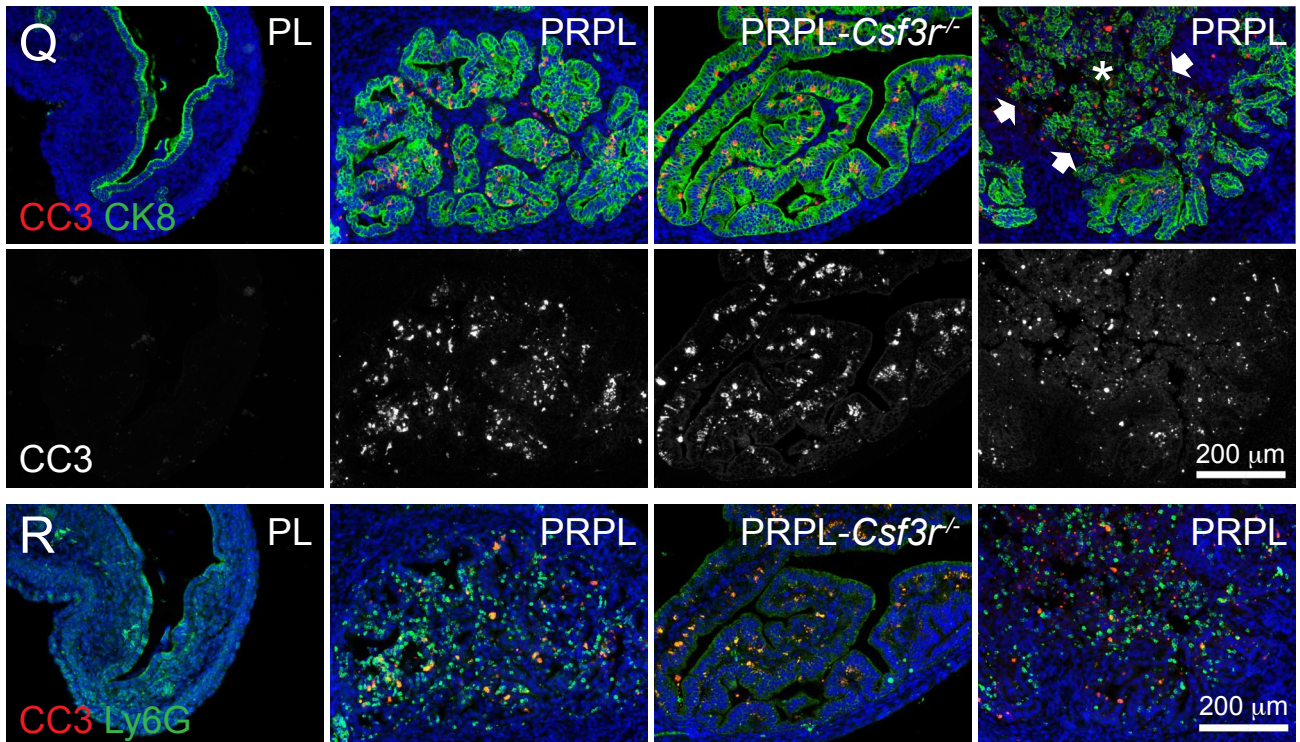



**Figure S3, related to Figure 3. Pathways of PMN-mediated tumor debulking.** (A) Wide field H&E stained image of intraluminal debris in a 4-week PRPL uterus. Yellow arrowheads indicate several tumor cells with pyknotic nuclei and deeply eosinophilic cytoplasm, both indicators of early necrosis. The sharp borders of the debris in this image are likely due to it aggregating and being “molded” by the lining of the intact uterus. Asterisk: intraluminal debris; e: intact epithelium; s, stroma. (B, C) Representative images and quantified fraction of integrin  $\beta 4$  immunostaining in the uterine epithelial BMZ. The  $\beta 4$  antibody also stained PMNs (yellow arrowheads), a presumed cross-reaction given that uterine PMNs do not express this integrin subunit by flow cytometry (data not shown). The white arrows point to a stretch of BMZ in the PRPL image that shows intense  $\beta 4$  concentration; note the low level of staining elsewhere in this image. (D, E) Uterine weight and percent uterine cross-sectional area comprised of intact tumor epithelium in 4-week-old PRPL, PRPL-*Rag2*<sup>-/-</sup>, and PRPL-*Rag2*<sup>-/-</sup>/*Ii2rg*<sup>-/-</sup> mice. Tumor burden (Figure 3J) was calculated as the product of these two parameters since the latter represents the proportion of the entire uterus occupied by living tumor. PRPL data are the same as in Figure 2. (F, G) Tumor cell proliferation as assessed by pH3 immunostaining. (F) Representative 4-week tissue sections co-stained for pH3 and cytokeratin 8 (CK8) and (G) quantification of tumor cell positivity for pH3 within the intact CK8<sup>+</sup> tumor epithelium (\*\*p < 0.005), demonstrating that 4-week PRPL tumor cells are proliferating more rapidly than 4-week PRPL-*Csf3r*<sup>-/-</sup> tumor cells. White arrow: pH3<sup>+</sup> tumor cell within intraluminal debris. Consistent with more rapid cycling, PRPL tumor cells were also smaller than their 4-week PRPL-*Csf3r*<sup>-/-</sup> counterparts as evidenced by (H) increased epithelial cell density, which was determined histologically as the number of epithelial nuclei per unit area of intact, CK8<sup>+</sup> tumor epithelium (see Supplemental Experimental Procedures) and (I) a flow cytometric analysis of viable tumor cells in 4-week uterine cell suspensions (representative of n = 4 mice per group). Viable tumor cells were gated as 7-AAD<sup>-</sup>CD45<sup>+</sup>EpCAM<sup>+</sup>, as in panel M. More rapid PRPL tumor cell cycling was also indicated by functional annotation of transcripts with significantly ( $p_{\text{adj}} < 0.05$ ) altered expression in RNA-seq data from 4-week sorted tumor cells (J), which revealed that genes associated with cell cycling were by far the most significantly enriched group in PRPL versus PRPL-*Csf3r*<sup>-/-</sup> sorted tumor cells. The panel shows gene ontology (GO) terms with the highest ( $p < 0.001$ ) levels of significance (n = 3-4 samples per group). See also panels M-O below. (K) Notably, *in vivo* detection of cells in S phase via BrdU incorporation revealed comparable levels of BrdU<sup>+</sup> tumor cells within the intact, CK8<sup>+</sup> tumor epithelium of 4-week-old PRPL and PRPL-*Csf3r*<sup>-/-</sup> mice. BrdU was injected 2 hr prior to sacrifice. The discrepancy between pH3 and BrdU labeling presumably reflects proportionally shorter lengths of multiple phases of the cell cycle (aside from M phase) in PRPL tumor cells (Nowakowski et al., 1989). (L) As one potential mechanism of increased cycling, PRPL but not PRPL-*Csf3r*<sup>-/-</sup> uteri showed reduced nuclear accumulation of the G<sub>1</sub> cyclin-dependent kinase inhibitor p27<sup>Kip1</sup> within epithelial cells when compared to PL uteri. The panels show representative p27<sup>Kip1</sup> immunostaining of uterine sections from 4-week-old mice (n ≥ 3 mice per group). Sections were co-stained for CK8 to visualize epithelial cells (top). In the PRPL section, note the loss of nuclear p27<sup>Kip1</sup> in the epithelial compartment but not in the stroma. The bottom panels show p27<sup>Kip1</sup> stain alone to accentuate the selective loss of p27<sup>Kip1</sup> in the PRPL epithelium. (M) Gating strategy for tumor cell sorting prior to RNA-Seq analysis. Depicted cells were previously gated on total viable (7-AAD<sup>-</sup>) cells. (N) Principle component analysis of RNA-Seq data. Note that PRPL and PRPL-*Csf3r*<sup>-/-</sup> groups cluster separately. (O) DAVID list of genes in GO Term ‘Mitotic Cell Cycle’ (see panel J) revealed in RNA-seq data to be up-regulated in PRPL versus PRPL-*Csf3r*<sup>-/-</sup> sorted tumor cells. (P) Identification of early apoptotic tumor cells using fluorescence inhibitor of caspases (FLICA) to detect cleaved caspase-3/7 in 4-week uteri. Contour plots (left) depict representative epithelial/tumor cells, gated as 7-AAD<sup>-</sup>CD45<sup>+</sup>Ly6G<sup>+</sup>EpCAM<sup>+</sup> cells. Graph (right) shows mean ± SEM of one of two independent experiments with similar results (n ≥ 2 mice per group per experiment). \*p < 0.05; \*\*\*p < 0.005. (Q, R) Representative cleaved caspase-3

(CC3)/CK8 and CC3/Ly6G immunostaining of serial uterine sections from 4-week-old mice (n ≥ 3 mice per group). The arrows and asterisk in the top right panel demarcate a large area of intraluminal debris. Note that CC3<sup>+</sup> cells are found in debris and intact epithelium alike, and that many CK8<sup>+</sup> tumor cells but few PMNs are CC3<sup>+</sup>.



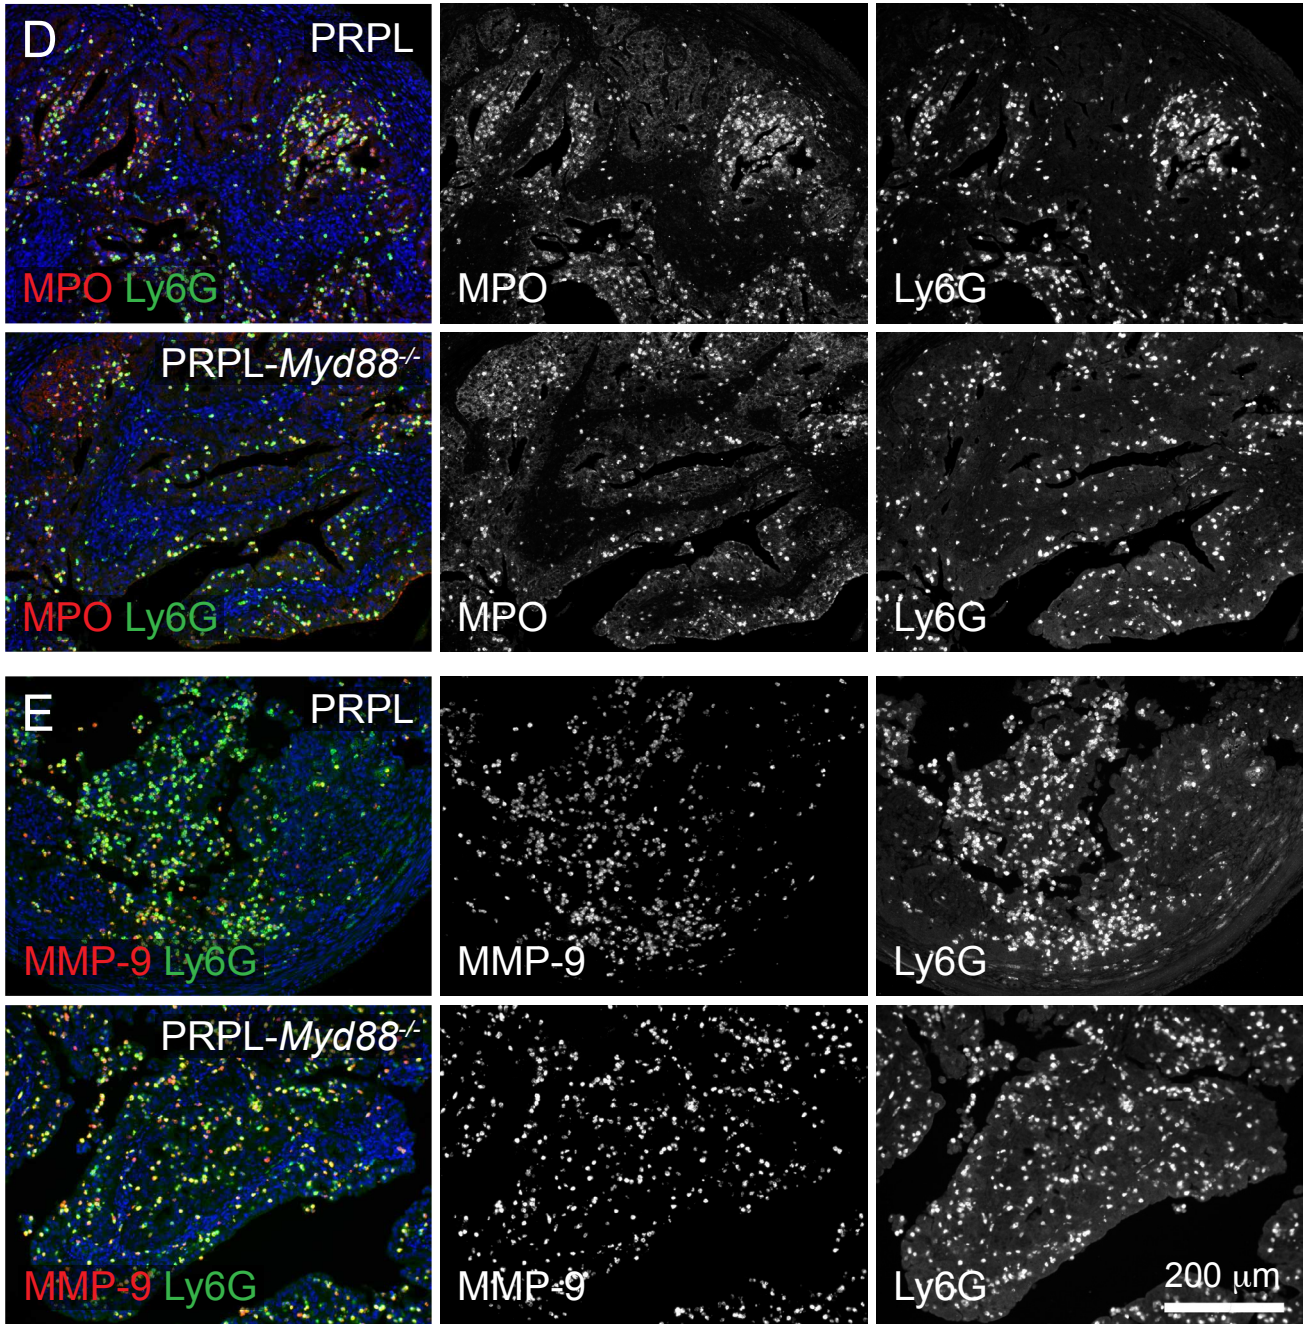

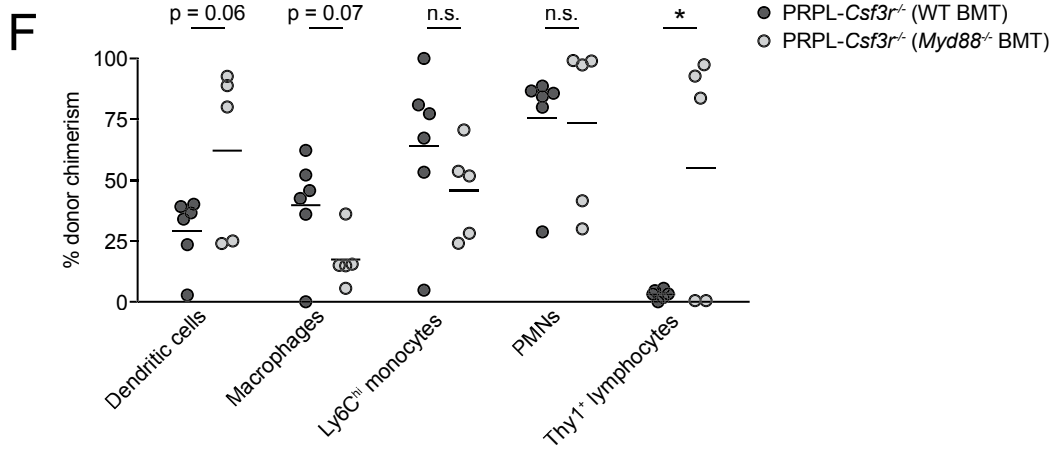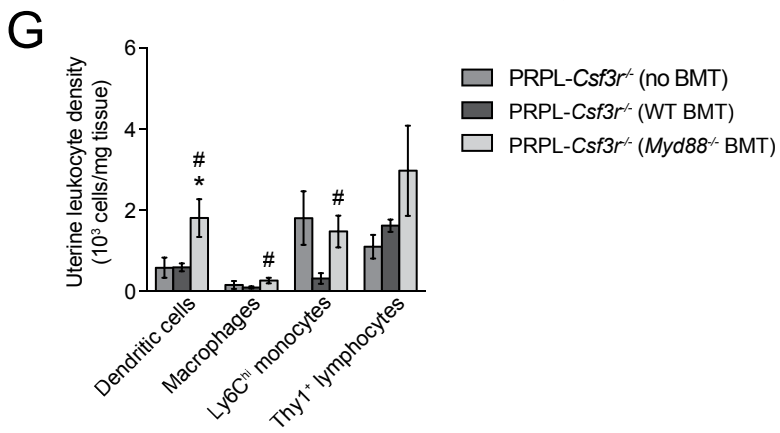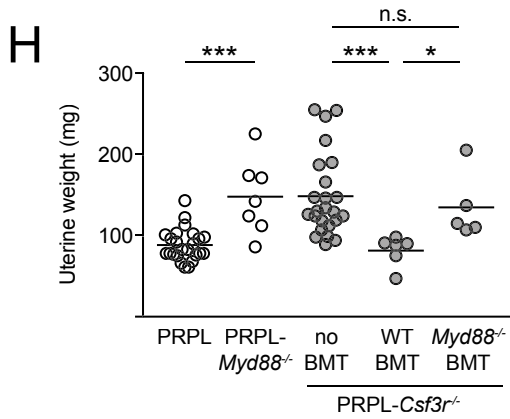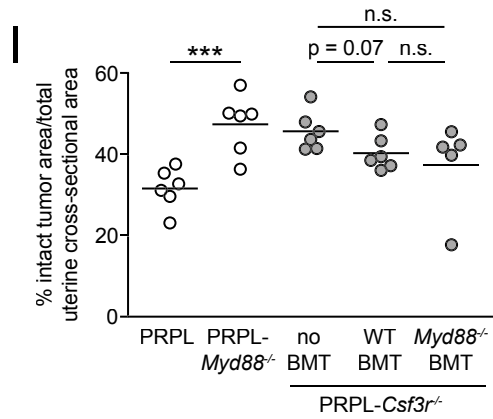



**Figure S4, related to Figure 4. PMN activation and generation of PRPL-*Csf3r*<sup>-/-</sup> BMT mice.** (A) Additional images of pAKT/Ly6G immunostaining of PL-AdCre uteri. At 6 days post-infection (dpi), pAKT<sup>+</sup> lesions were nearly all PMN-free and formed largely flat, short segments interspersed within the otherwise normal uterine epithelium. At 10 dpi, some lesions remained flat (white arrow) and some had formed papillary structures (yellow arrow). The nascent tumor in the middle 10 dpi image has not yet been infiltrated with PMNs; the tumor in the right 10 dpi image shows partial PMN infiltration. At 4 weeks post-infection (wpi), most pAKT<sup>+</sup> lesions were large, had invaginated into the endometrial stroma, and were infiltrated with PMNs (bottom left). However, 4 wpi uteri occasionally also contained small PMN-free pAKT<sup>+</sup> lesions (bottom right). Representative images from n ≥ 3 mice per time point. (B) Time course of PMN density per total, pAKT<sup>+</sup> tumor cross-sectional area, determined histologically in Ly6G/pAKT stained sections of PL-AdCre mice. (C) Time course of intraluminal debris generation in PL-AdCre mice. (D, E) MPO and MMP-9 immunostaining in 4-week PRPL and PRPL-*Myd88*<sup>-/-</sup> uteri. Note that both proteins co-localize with Ly6G<sup>+</sup> PMNs and show similar staining intensities in PRPL versus PRPL-*Myd88*<sup>-/-</sup> uteri. Representative images from n ≥ 3 mice per group. (F) Chimerism of various leukocyte subsets in the uteri of 4-week-old PRPL-*Csf3r*<sup>-/-</sup> mice injected as neonates with bone marrow cells from the indicated sources. Chimerism was calculated by flow cytometry as the percentage of cells expressing the congenic mark (CD45.1 or CD45.2) that identified donor cells. (G) Uterine tissue densities of non-PMN leukocytes. \*p < 0.05 versus PRPL-*Csf3r*<sup>-/-</sup> (no BMT); #p < 0.05 versus PRPL-*Csf3r*<sup>-/-</sup> (WT BMT). Data show mean ± SEM for n = 5-6 mice per group. (H, I) Uterine weight and percent uterine cross-sectional area comprised of intact tumor epithelium in the indicated 4-week-old mice. Tumor burden (Figure 4E) was calculated as the product of these two parameters since the latter represents the proportion of the entire uterus occupied by living tumor. PRPL and PRPL-*Csf3r*<sup>-/-</sup> (no BMT) data are the same as in Figure 2. \*p < 0.05; \*\*\*p < 0.005.

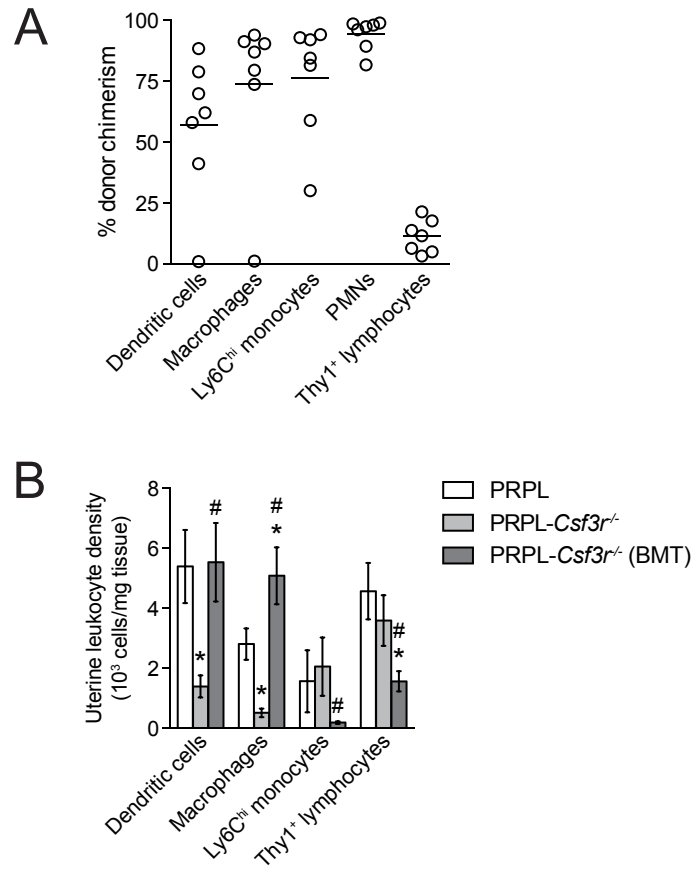

**Figure S5, related to Figure 5. Chimerism and uterine leukocyte tissue densities in 12-week-old PRPL-*Csf3r*<sup>-/-</sup> (BMT) mice.** (A) Chimerism of various uterine leukocyte subsets calculated by flow cytometry as the percentage of cells expressing the donor-derived CD45.1 congenic mark. (B) Uterine leukocyte densities, as determined by flow cytometry. \* $p < 0.05$  versus PRPL; # $p < 0.05$  versus PRPL-*Csf3r*<sup>-/-</sup>. Of note, the uterine densities of Ly6C<sup>hi</sup> monocytes, the main other hematopoietic lineage known to express G-CSFR (Christopher et al., 2011), were modestly reduced in PRPL-*Csf3r*<sup>-/-</sup> (BMT) mice.

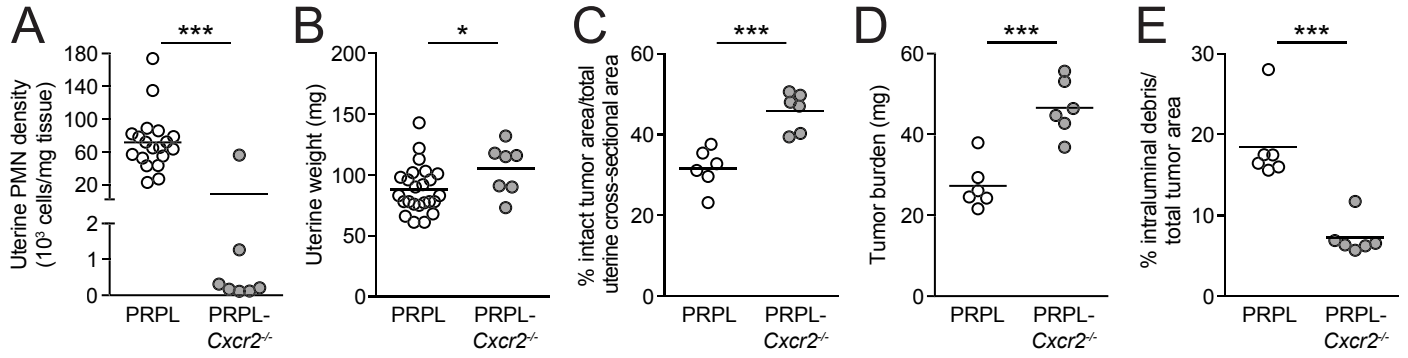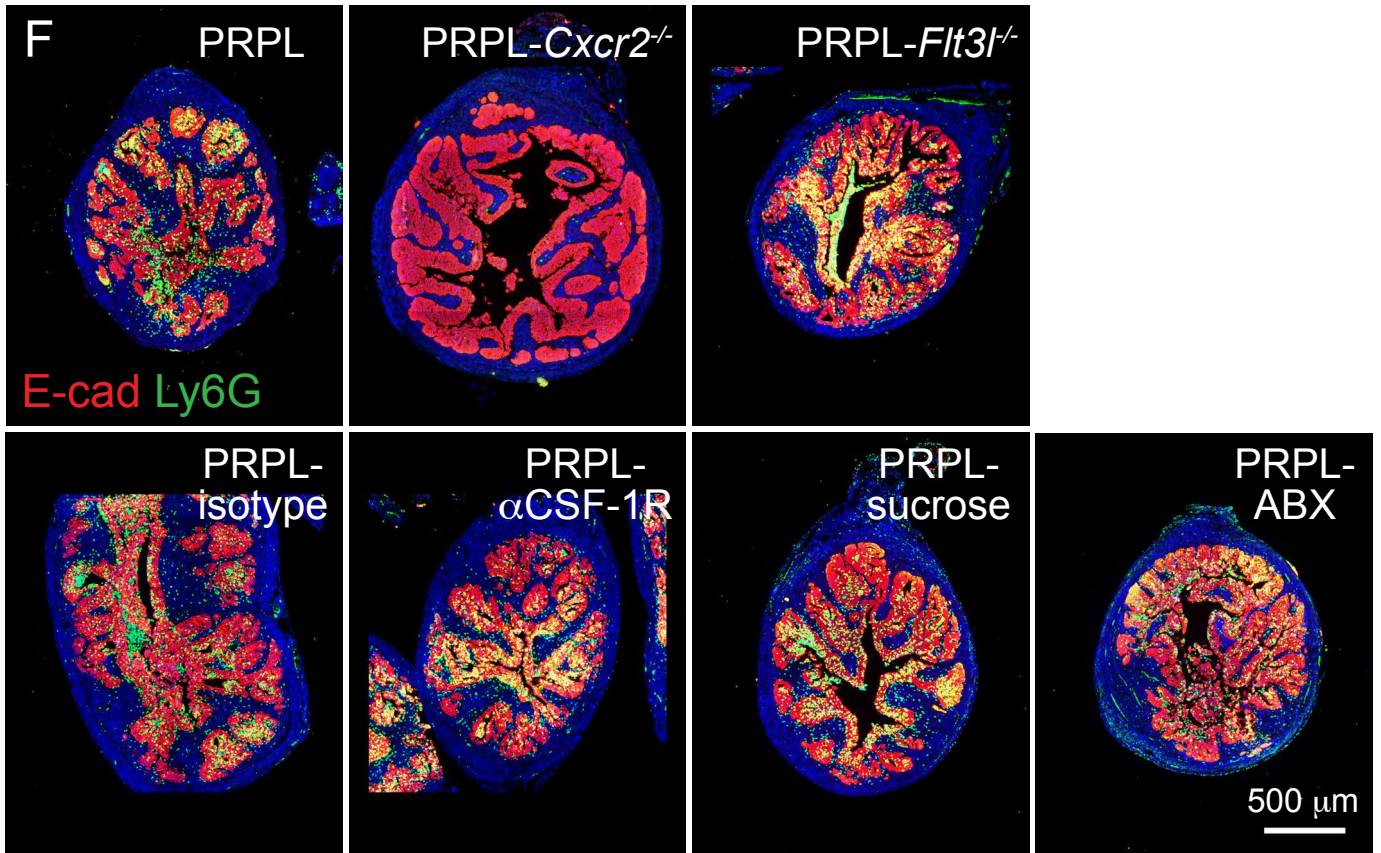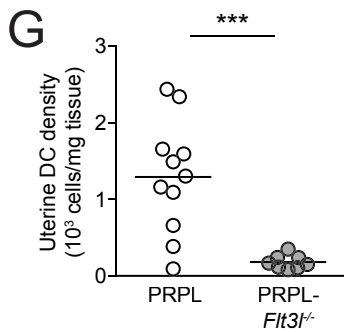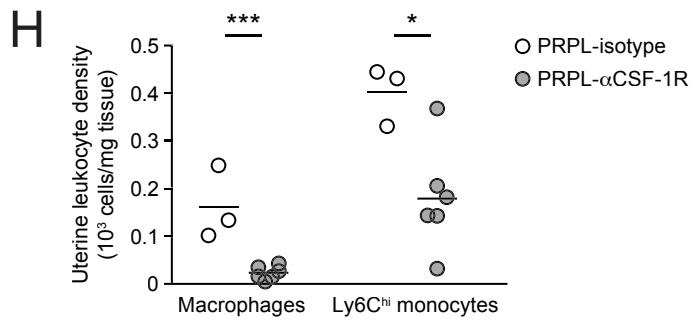

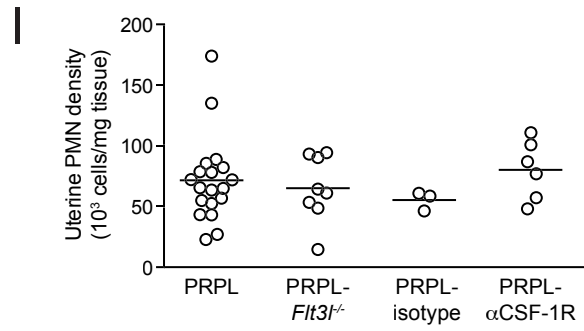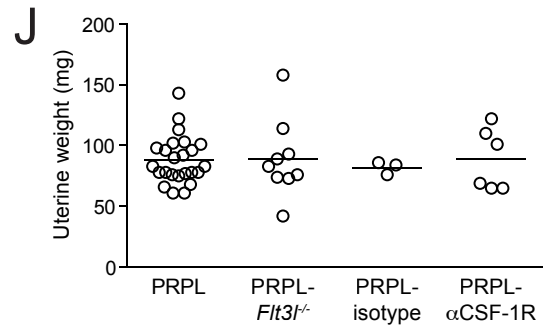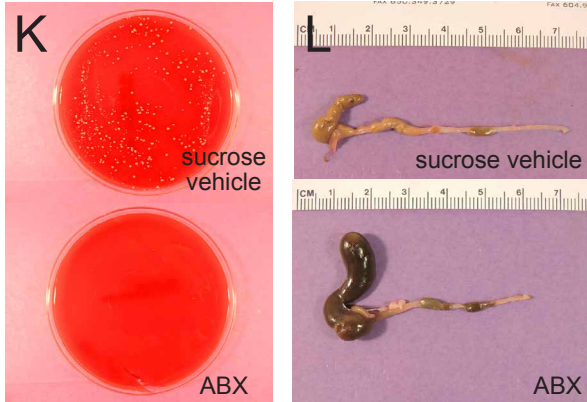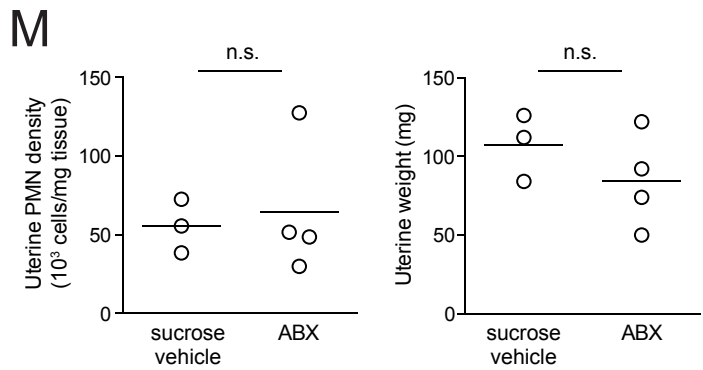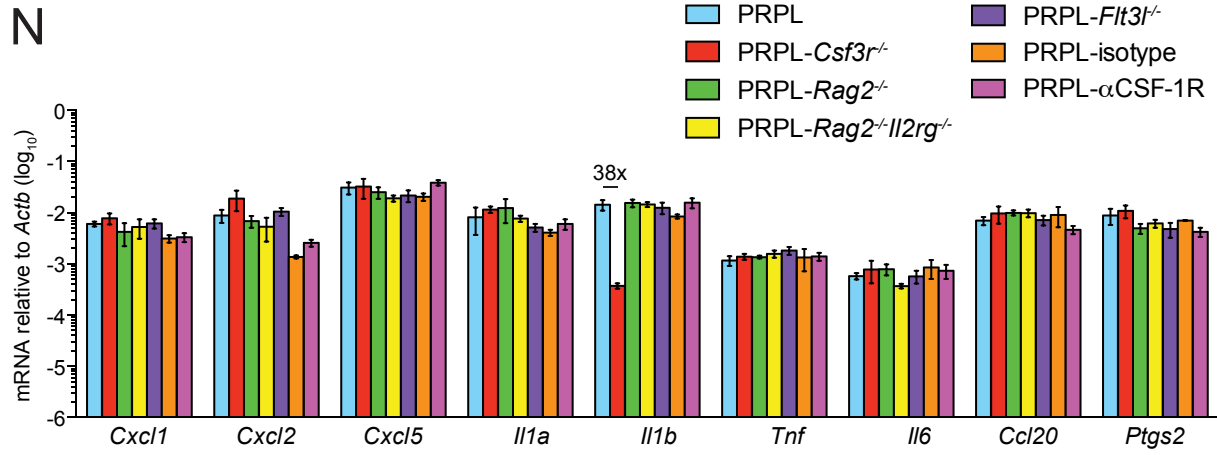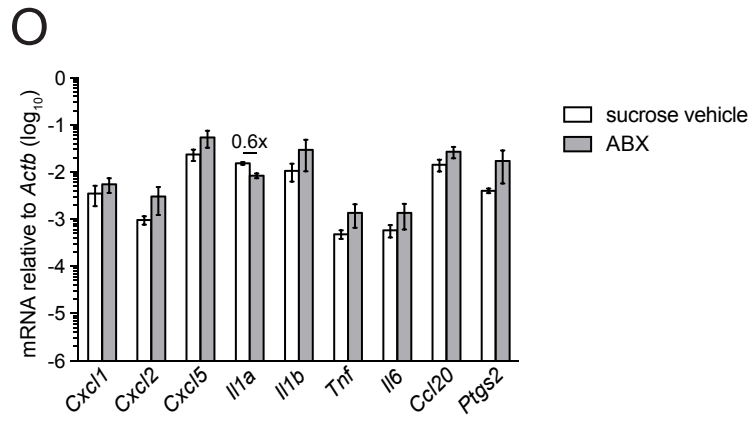

**Figure S6, related to Figure 6. Further analysis of tumor cell-extrinsic stimuli on PMN recruitment and function.** (A-E) Uterine PMN densities, weights, percent cross-sectional area comprised of intact tumor epithelium, tumor burden (uterine weight X % cross-sectional area comprised of intact tumor epithelium), and prevalence of intraluminal debris of total tumor area (intact epithelium plus debris) in 4-week-old PRPL and PRPL-*Cxcr2*<sup>-/-</sup> mice. The PRPL mice shown are the same ones analyzed in Figure 2. \**p* < 0.05; \*\*\**p* < 0.005. (F) Representative E-cad/Ly6G immunostained uterine sections from 4-week-old mice depleted of various leukocyte subsets. Note the PRPL-*Cxcr2*<sup>-/-</sup> uterus lacks Ly6G<sup>+</sup> PMNs but does not have as striking a papillary morphology as PRPL-*Csf3r*<sup>-/-</sup> uteri (see Figure 2E), suggesting a role for CXCR2 in PRPL tumorigenesis outside of PMN trafficking (e.g. Reutershan et al., 2006). Representative of *n* ≥ 3 mice per group. (G) Demonstration of uterine DC deficiency in 4-week-old PRPL-*Fit3l*<sup>-/-</sup> mice. Values indicate the sum of CD11b<sup>lo</sup> and CD11b<sup>hi</sup> DC subsets, both of which were individually also significantly reduced in PRPL-*Fit3l*<sup>-/-</sup> uteri (not shown). PRPL data is the same as that used for Figure S2A. \*\*\**p* < 0.005. (H) Demonstration of uterine macrophage and Ly6C<sup>hi</sup> monocyte depletion in 4-week-old PRPL mice following treatment with antibodies to CSF-1R (PRPL- $\alpha$ CSF-1R) from postnatal day 14 versus PRPL mice treated with isotype control antibodies (PRPL-isotype). \**p* < 0.05; \*\*\**p* < 0.005. (I, J) Uterine PMN densities and weights in 4-week-old mice. No differences are significant. (K) Demonstration of reduced gut flora in antibiotics-treated (ABX) 4-week-old PRPL mice when compared to sucrose vehicle-treated PRPL mice. 10 mg fecal pellet was homogenized in 1 ml PBS and 50  $\mu$ l of a 10<sup>6</sup>-fold dilution was plated on sheep's blood agar and incubated overnight at 37° C. (L) Representative gross images of cecum and colon from 4-week-old ABX- versus sucrose vehicle-treated PRPL mice. Note the substantially enlarged cecum in ABX-treated mice, indicative of commensal microbe depletion. (M) PMN density and weight of 4-week-old ABX- versus sucrose-treated uteri. (N, O) qRT-PCR analysis of ELR-CXC chemokine and other inflammatory gene expression in 4-week whole uteri. Data show mean  $\pm$  SEM for *n* ≥ 3 mice per group. Significant differences (*p* < 0.05) are indicated as fold change. PRPL data set in panel N is the same as in Figure 6A.



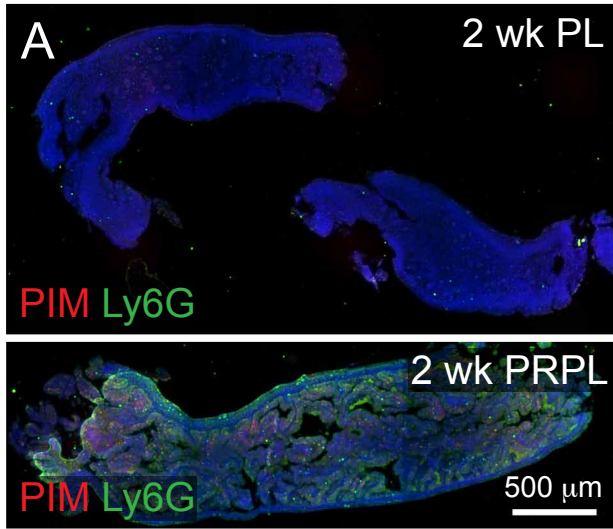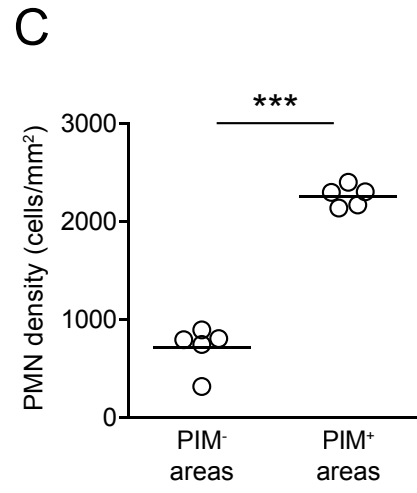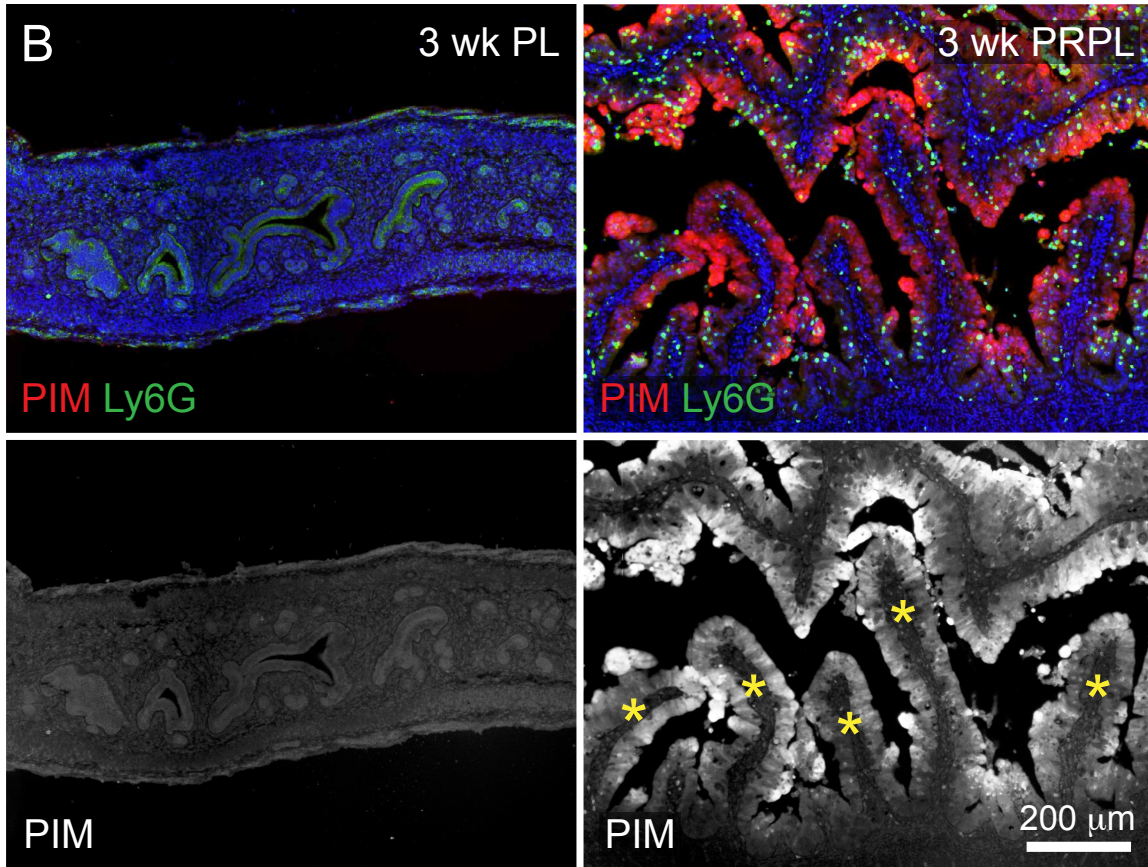

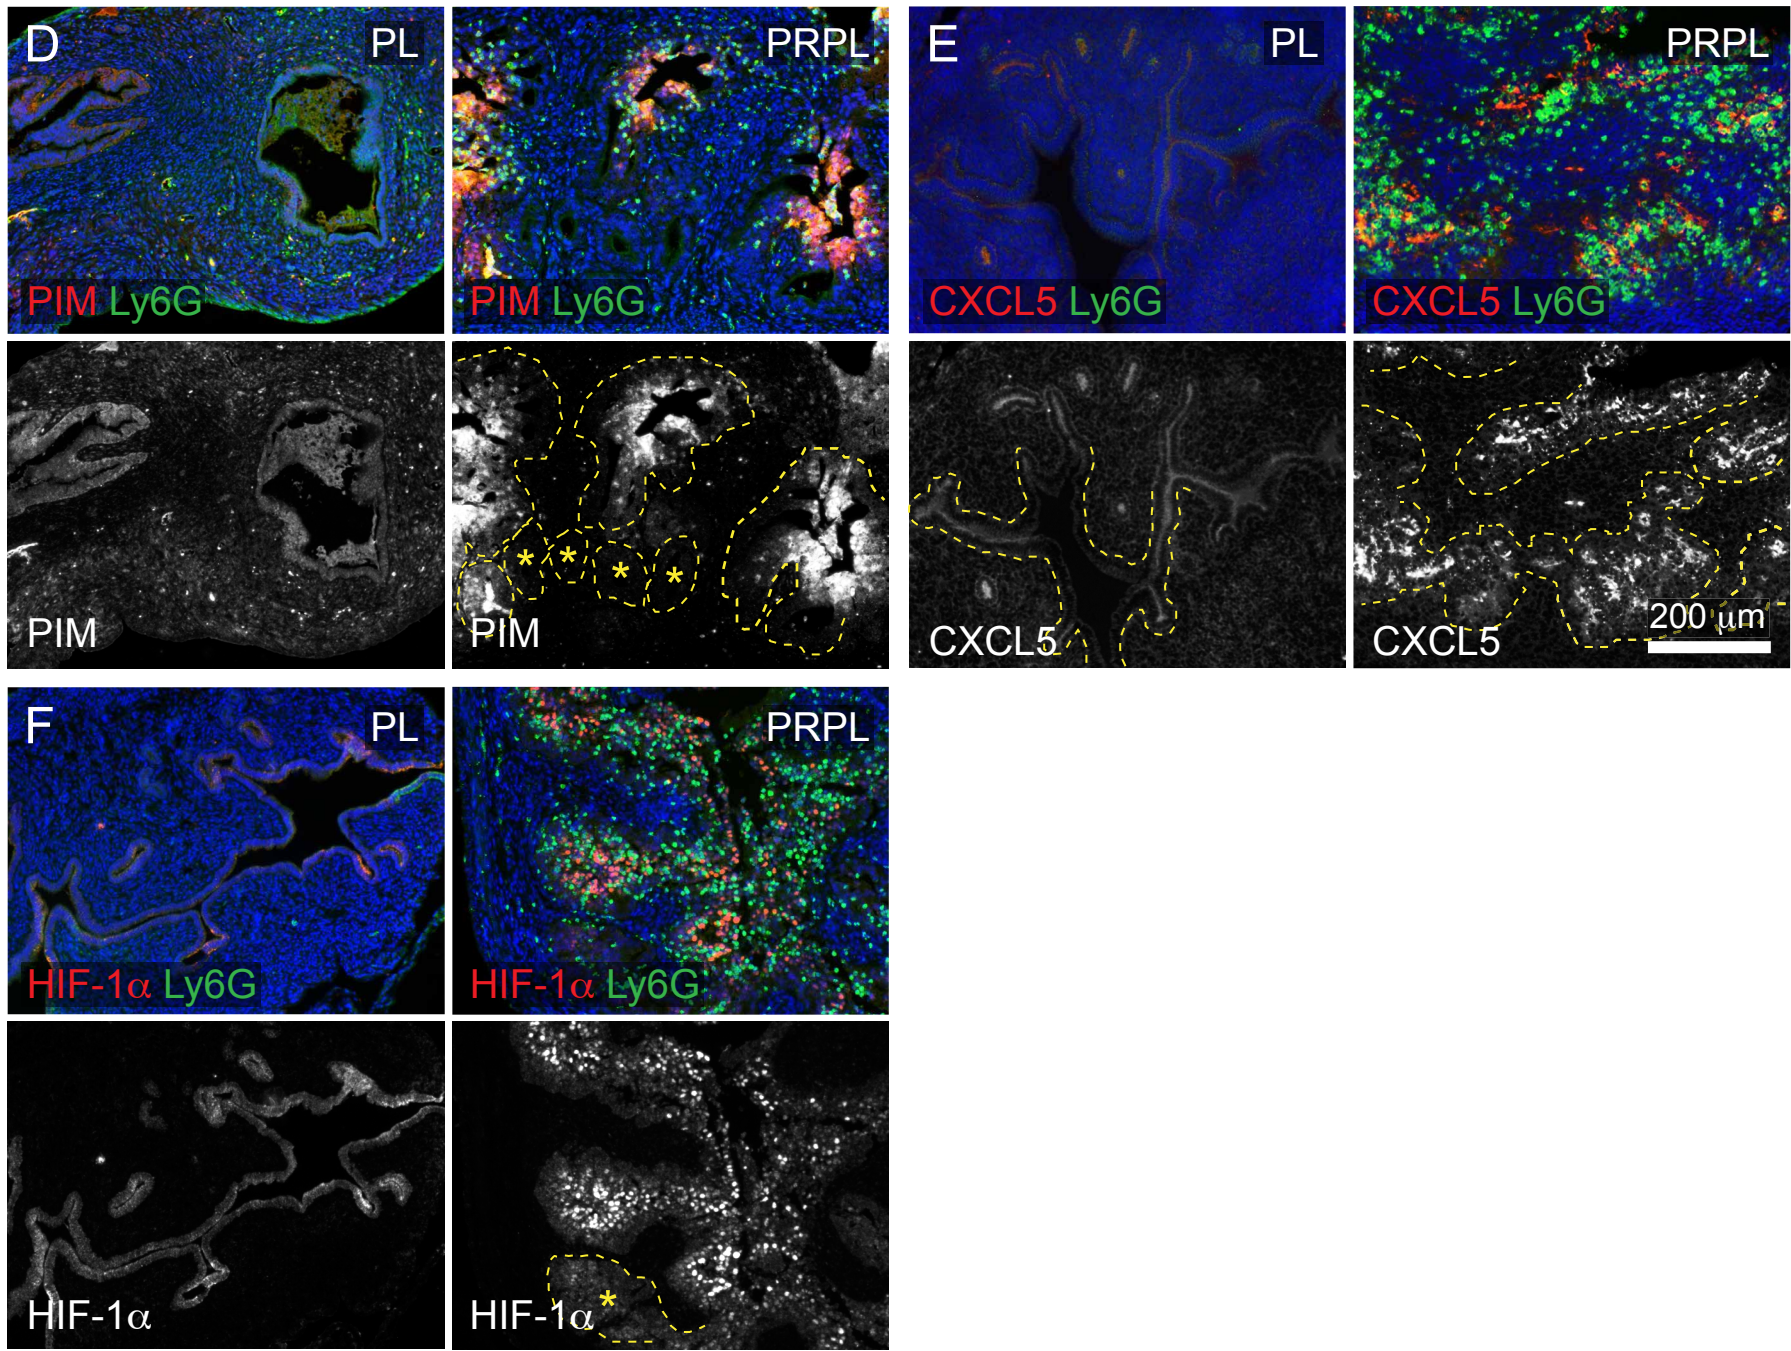



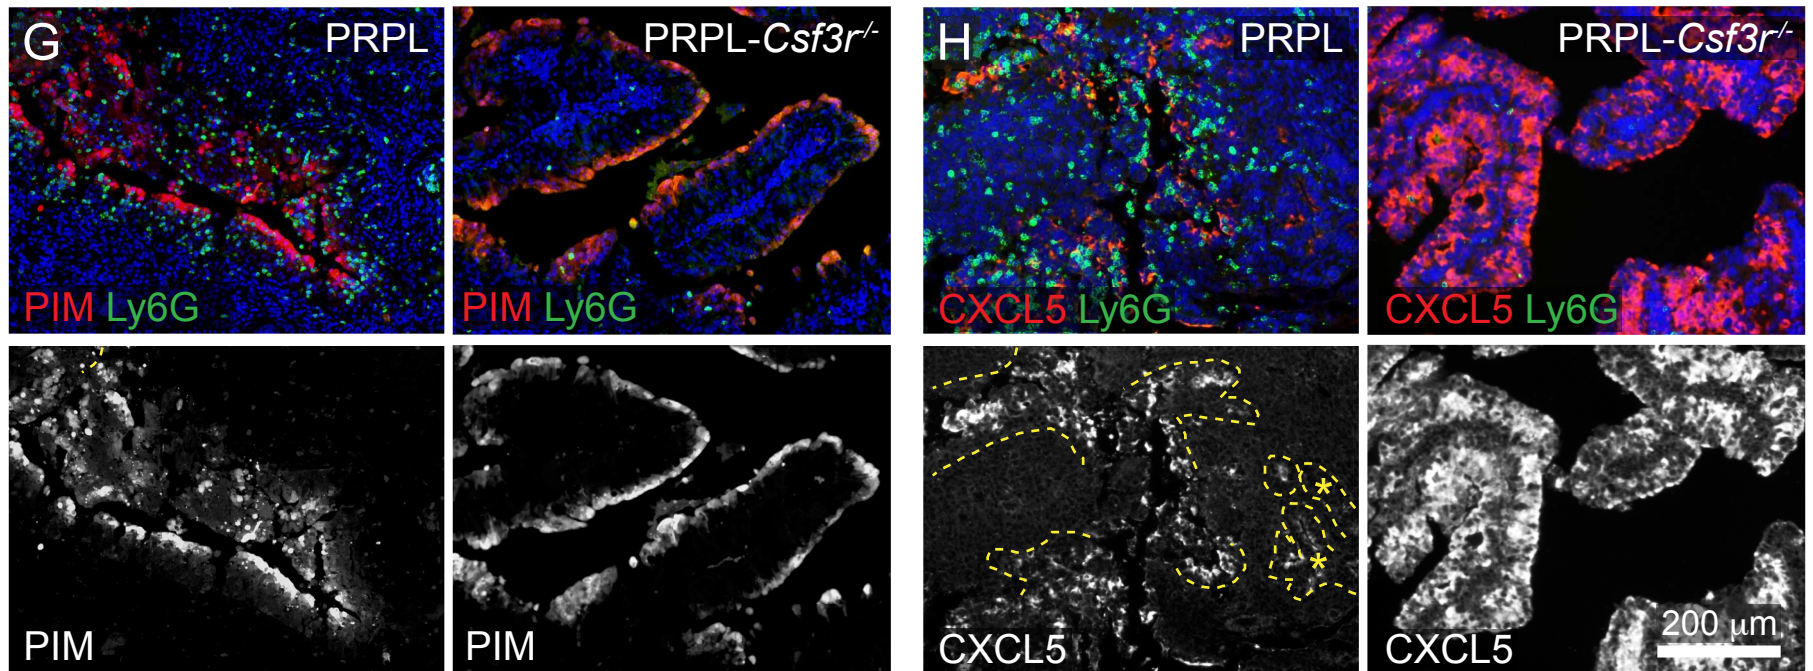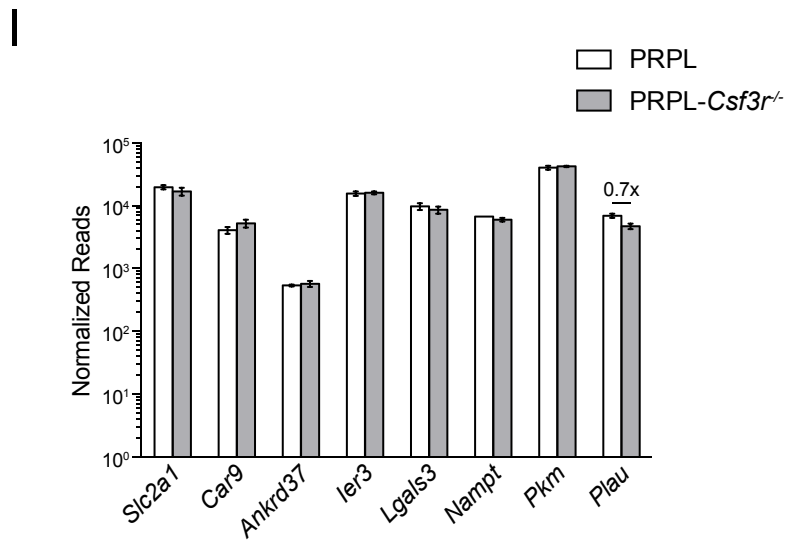

**Figure S7, related to Figure 7. Additional images and analysis documenting the spatial relationship between PMNs, uterine hypoxia and inflammation.** In order to ensure controlled comparisons, the section of interest and its paired control for every panel set were from specimens that were fixed and processed at the same time and then embedded within the same paraffin block. Following immunostaining, the images were captured off of the same slide and at the same exposure. Brightness and contrast manipulations were then applied in the same way to paired images. When not obvious, the border between the epithelium and stroma is demarcated with dashed yellow lines. All images are representative of  $n \geq 3$  mice per group. (A) PIM/Ly6G immunostained uterine sections from paired 2-week-old mice. The diffuse green staining in the PRPL image is non-specific background. (B) Close-up of the PIM/Ly6G immunostained uterine sections from the paired 3-week-old mice shown in Figures 7A and 7B. Note the PIM<sup>+</sup> staining throughout the epithelium of the PRPL uterus, even in areas organized into papillary structures (asterisks). These latter areas are relatively PMN-free. (C) PMN densities in hypoxic (PIM<sup>+</sup>) versus non-hypoxic (PIM<sup>-</sup>) tumor foci in 4-week PRPL uteri. \*\*\* $p < 0.005$ . (D-F) PIM/Ly6G, CXCL5/Ly6G, and HIF-1 $\alpha$ /Ly6G immunostaining of paired 4-week PL and PRPL sections. Some tumor foci lacking PMNs are indicated with asterisks. (G-H) PIM/Ly6G and CXCL5/Ly6G immunostaining of paired 4-week PRPL and PRPL-*Csf3*<sup>-/-</sup> sections. (I) RNA-seq data of hypoxia-induced genes in 4-week PRPL versus PRPL-*Csf3*<sup>-/-</sup> sorted tumor cells ( $n = 3-4$  samples per group). Significant difference ( $p < 0.05$ ) is indicated as fold change.

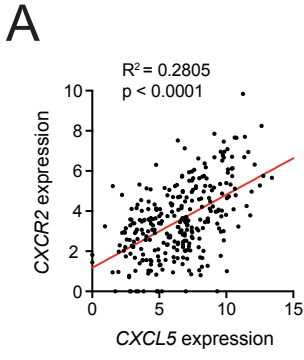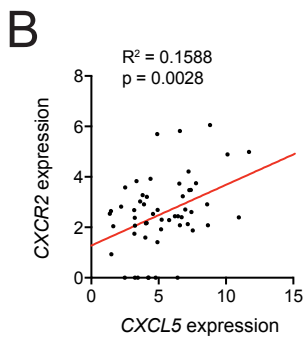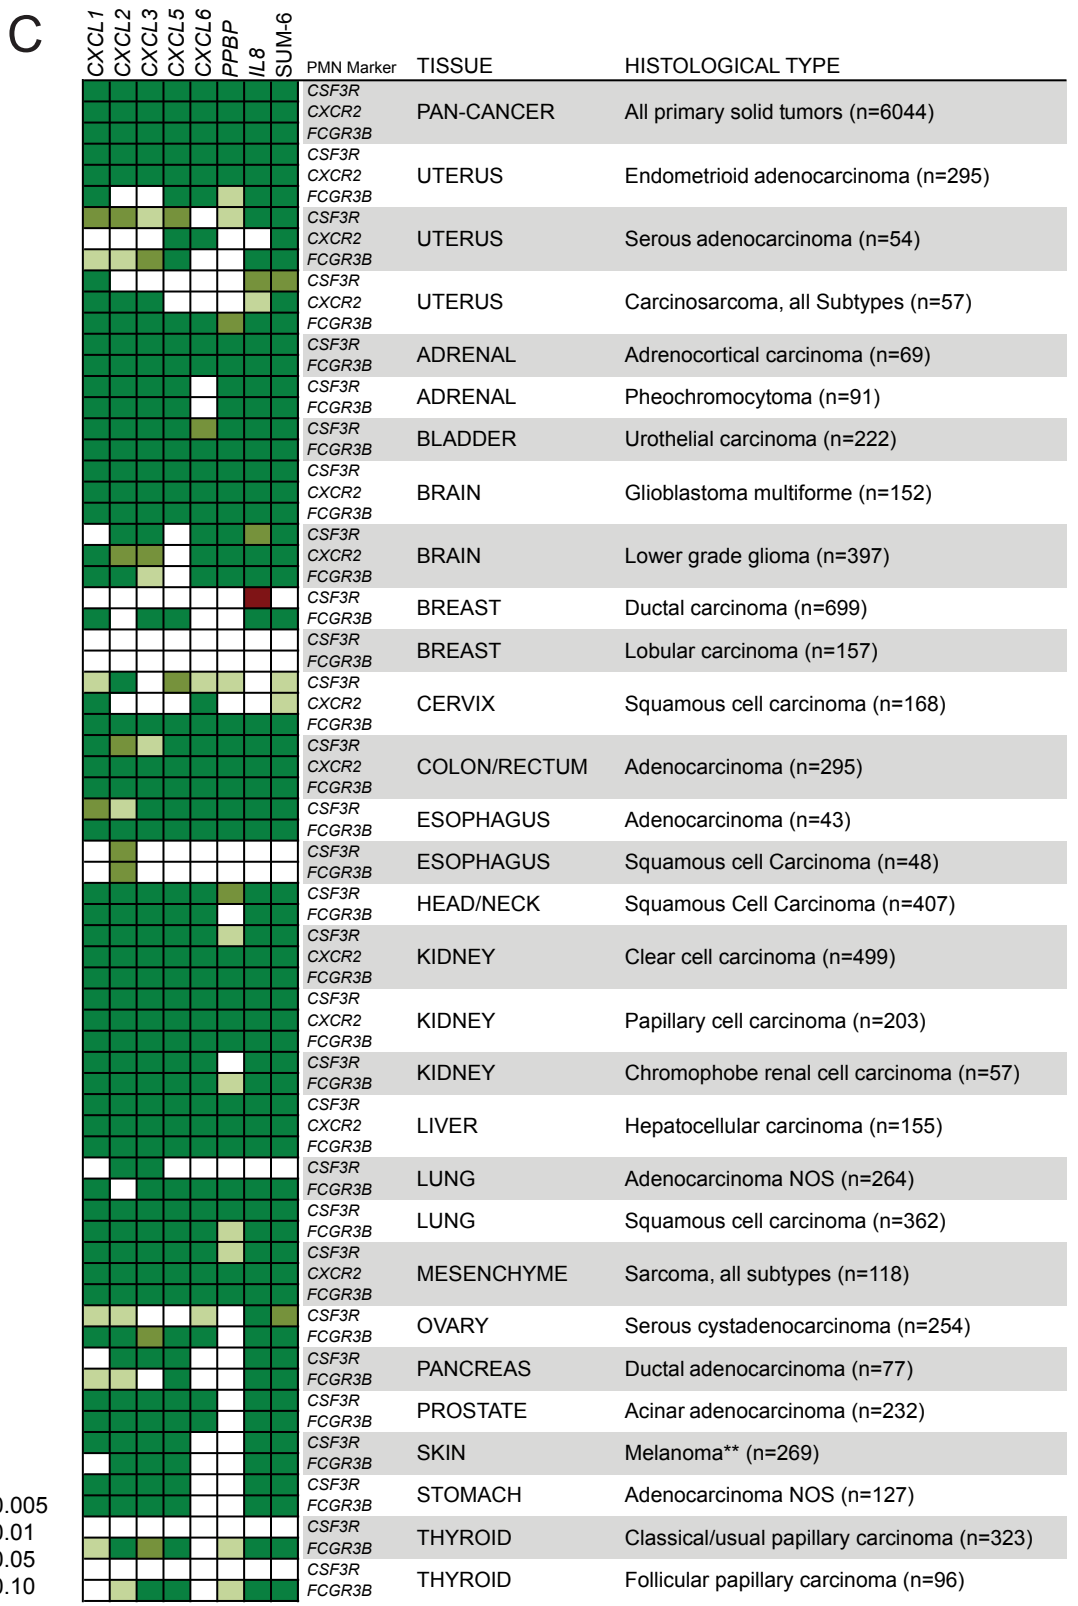

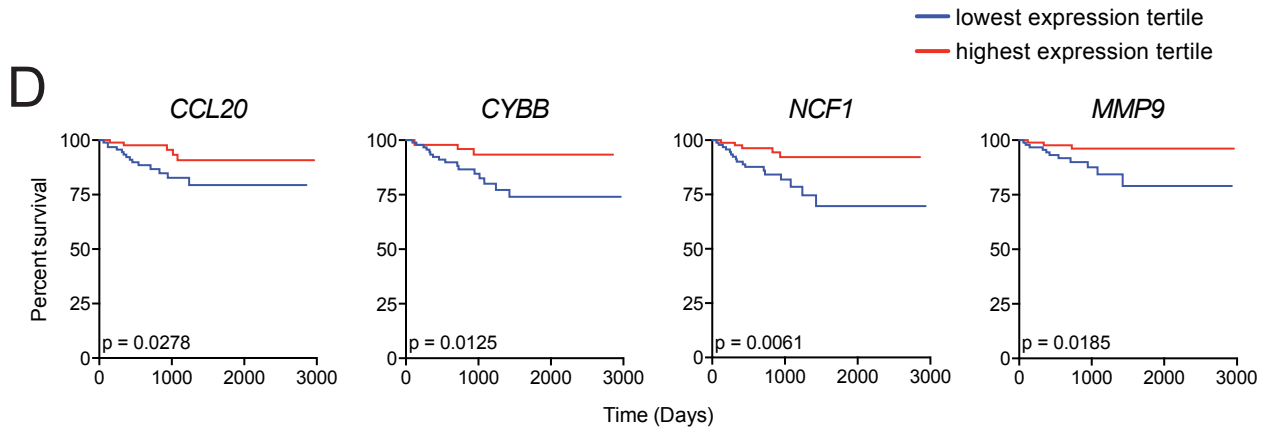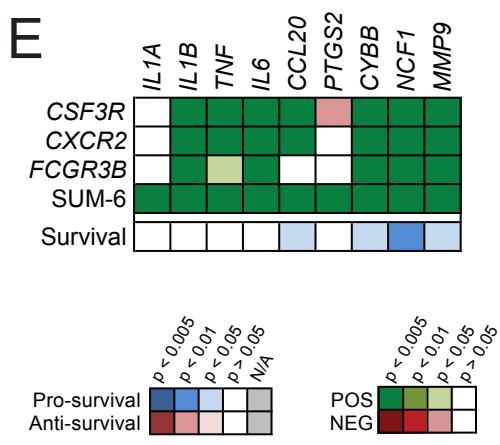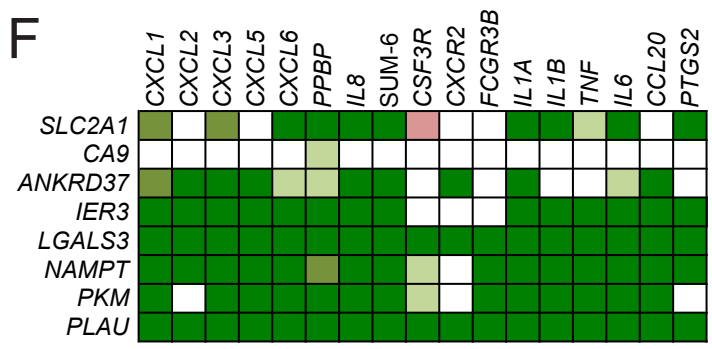

**Figure S8, related to Figure 8. Correlation of hypoxia, inflammation, PMN infiltration and survival outcome in human cancers.** (A, B) Representative linear regression analyses from TCGA RNA-seq data comparing tumor expression of an ELR-CXC chemokine gene (*CXCL5*) with a PMN-specific gene (*CXCR2*) in endometrioid EC (A) and serous EC (B). (C) Correlation of ELR-CXC chemokine and PMN-specific gene expression across many human cancers. Heat map represents p values from linear regression analyses, like those in panels A and B, across the indicated cancer subtypes. ELR-CXC chemokine genes and SUM-6 are listed along the top, while PMN-specific genes are indicated on the right. Green shaded boxes denote a significant ( $p < 0.05$ ) positive (POS) correlation in expression for a given pair of genes; red shaded boxes denote a significant negative (NEG) correlation in expression; white boxes denote no significant correlation in either direction ( $p > 0.05$ ). Analyses using *CXCR2* were not possible for certain cancer subtypes because their datasets contained many samples with negligible *CXCR2* expression. Cancer tissue of origin, histological type and sample size are indicated on the right. (D) Survival analysis of PMN effector genes (*CYBB*, *NCF1*, *MMP9*) and the pro-inflammatory gene *CCL20* in human endometrioid EC, performed as in Figure 8A. (E) Correlation of the PMN signature (left) with the expression of other inflammatory and PMN effector genes (top) in human endometrioid EC. Heat map generated as in panel C. Bottom row indicates impact of each inflammatory and PMN effector gene (top) on survival outcome, as in Figure 8B. (F) Expressional correlation of hypoxia-induced genes (left) with PMN signature and other inflammatory genes (top) in human endometrioid EC. Heat map generated as in panel C.



## SUPPLEMENTAL EXPERIMENTAL PROCEDURES

**Bone marrow transfer (BMT).** Bone marrow harvested from femurs and tibias of 8-12-week-old mice was re-suspended in PBS to a concentration of  $1.5\text{-}4 \times 10^8$  cells/ml and injected ( $1.5\text{-}4 \times 10^7$  total) i.p. into neonatal (postnatal days 4-10) recipients. These recipients did not receive myeloablative irradiation or chemotherapy. For WT BMT, donor cells were taken from C57BL/6 CD45.1 mice (B6.SJL-*Ptprc*<sup>a</sup>/BoyAiTac; Taconic, model 4007) and injected into PRPL-*Csf3r*<sup>-/-</sup> (CD45.2) recipients. For *Myd88*<sup>-/-</sup> BMT, donor cells were taken from *Myd88*<sup>-/-</sup> mice (CD45.2) and injected into PRPL-*Csf3r*<sup>-/-</sup> recipients that had been crossed onto a CD45.1 background.

**Treatments.** For G-CSF neutralization, PRPL female mice were given daily intraperitoneal (i.p.) injections of 8  $\mu$ g monoclonal rat anti-mouse G-CSF (R&D Systems; clone 67604) or rat IgG<sub>1</sub> isotype control (BioXCell; HPRN) from postnatal day 19 (P19) until sacrifice on P28. For macrophage and monocyte depletion, PRPL females were given i.p. injections of 100  $\mu$ g monoclonal rat anti-mouse CSF-1R (BioXCell; AFS98) or rat IgG2a isotype control (BioXCell; 2A3) every other day from P14 until sacrifice on P28. For *in situ* proliferation studies, females were injected i.p. with 2 mg 5-bromo-2'-deoxyuridine (BrdU; Fisher Scientific) 2 hr prior to sacrifice. For *in situ* detection of hypoxia, mice were injected i.p. with 0.75 mg pimonidazole hydrochloride (Hypoxyprobe) 1.5 hr prior to sacrifice. Antibiotics treatment (1 mg/ml ampicillin; 1 mg/ml metronidazole; 1 mg/ml neomycin; 0.5 mg/ml vancomycin) was administered along with 1% sucrose in the drinking water of pregnant mice bearing PRPL pups beginning approximately 1 week prior to birth until sacrifice at 4 weeks of age. Control mice received drinking water with 1% sucrose only. Mice sacrificed at 8 or 12 weeks of age were injected subcutaneously with 2 mg progesterone (Sigma-Aldrich) diluted in sesame oil once daily for 3 days prior to sacrifice in order to normalize the effects of the estrus cycle on uterine morphology and leukocyte composition.

**Adenoviral infection.** Bilateral ovariectomy was performed on 4-week-old PL female mice. Two weeks post-surgery, mice were injected transcervically with  $1.0 \times 10^9$  pfu Adeno-Cre/GFP (University of Iowa Viral Vector Core) diluted in 10  $\mu$ l MEM. Injection was performed using a 10 ml Hamilton syringe with attached PE-10 polyethylene tubing (BD Biosciences) to blunt the needle as previously described (Collins et al., 2009).

**Cell culture.** ECC-1, Ishikawa, RL95-2, HEC-1A, HEC-1B and KLE human endometrial carcinoma cell lines were the gifts of Dr. Gottfried Konecny (UCLA Medical Center, Santa Monica, CA). Cells were cultured in DMEM (Corning) supplemented with 10% FBS (Atlanta Biologicals), 10 mM HEPES buffer, 2 mM L-glutamine, 100 IU/ml penicillin, 100  $\mu$ g/ml streptomycin, 1 mM sodium pyruvate and MEM non-essential amino acids (Corning). Cells were maintained at 37°C, 5% CO<sub>2</sub> and ambient oxygen (~21% O<sub>2</sub>). For hypoxia studies, cells were plated in triplicate within two separate 24-well plates at  $\sim 5.0 \times 10^5$  cells/well. After 24 h, one plate of cells was transferred to a Heracell 150i incubator (Thermo Scientific) adjusted to 1% O<sub>2</sub> while the other plate was maintained in ambient oxygen. Cells were cultured for an additional 48 hr prior to RNA isolation.

**Preparation and analysis of mouse tissue.** For flow cytometric analysis, dissected whole uterine tissue was digested as previously described (Collins et al., 2009). Briefly, uteri were minced and re-suspended in Hank's Balanced Salt Solution (HBSS) containing 0.28 Wünsch units/ml Liberase TM Research Grade (Roche Life Science) and 30  $\mu$ g/ml DNAase I (Roche), then incubated for 30 min at 37°C with intermittent trituration. Tissues were washed and then re-suspended in FACS buffer (PBS, 1% FBS, 5 mM EDTA) and incubated at 37°C for an additional 15 min, after which they were filtered through 70  $\mu$ m nylon mesh. For analyses of blood and bone marrow, cells were harvested and processed exactly as uterine tissue without prior erythrocyte lysis to avoid potential activating effect on PMNs.

For basic cell surface staining,  $\sim 2.0 \times 10^6$  cells were exposed to 10  $\mu$ g/ml rat anti-mouse CD16/CD32 (BioXCell; 2.4G2) to block non-specific binding. Cells were then stained with the appropriate cocktail of fluorochrome-conjugated primary antibodies (see Supplemental Experimental Tables), and lastly were treated with 5  $\mu$ g/ml 7-aminoactinomycin D (7-AAD; BD Pharmingen) for live/dead discrimination. Samples were analyzed using a 10-color 3-laser BD LSR II flow cytometer. Viable leukocyte (CD45<sup>+</sup>7-AAD<sup>-</sup>) numbers were determined following doublet discrimination using FCS Express (De Novo Software), and were further divided into subsets using the gating strategies in Figure S1B. To calculate leukocyte subset densities, the percentage of a given leukocyte subset among total viable (7-AAD<sup>-</sup>) singlet cells was multiplied by the total number of cells counted in the sample (Trypan Blue exclusion), then divided by the weight of the digested tissue. Dot plots and histograms for figures were generated using FlowJo (Tree Star, Inc.). Blood samples were additionally lysed using ACK Lysing Buffer (Lonza) and re-filtered immediately prior to acquisition.

**Flow cytometry antibodies.**

| <b>Antigen</b>     | <b>Company</b> | <b>Clone</b>   | <b>Catalog No.</b> | <b>Fluorochrome</b>  |
|--------------------|----------------|----------------|--------------------|----------------------|
| $\alpha 6$         | Biolegend      | GoH3           | 313615             | APC                  |
| $\beta 1$          | Biolegend      | HM $\beta$ 1-1 | 102215             | APC                  |
| $\beta 4$          | Biolegend      | 346-11A        | 123605             | FITC                 |
| CD4                | Biolegend      | GK1.5          | 100414             | APC/Cy7              |
| CD8 $\alpha$       | Biolegend      | 53-6.7         | 100708             | PE                   |
| CD11b              | BD Pharmingen  | M1/70          | 557657             | APC/Cy7              |
| CD11c              | Biolegend      | N418           | 117318             | PE/Cy7               |
| CD45               | Biolegend      | 30-F11         | 103138             | Brilliant Violet 510 |
| CD45.1             | BD Pharmingen  | A20            | 553775             | FITC                 |
| CD45.2             | Biolegend      | 104            | 109830             | PE/Cy7               |
| F4/80              | Biolegend      | BM8            | 123116             | APC                  |
| IL-1 $\beta$       | eBioscience    | NJTEN3         | 17-7114-80         | APC                  |
| Ly6C               | BD Pharmingen  | AL-21          | 553104             | FITC                 |
| Ly6G               | Biolegend      | 1A8            | 127622             | Alexa Fluor 700      |
| MHCII (I-A/I-E)    | Biolegend      | M5/114.15.2    | 107620             | Pacific Blue         |
| NK1.1              | BD Pharmingen  | PK136          | 552878             | PE/Cy7               |
| TCR $\beta$        | Biolegend      | H57-597        | 109212             | APC                  |
| TCR $\gamma\delta$ | BD Pharmingen  | GL3            | 553177             | FITC                 |
| Thy1.2             | Biolegend      | 53-2.1         | 140306             | Pacific Blue         |

For IL-1 $\beta$  intracellular cytokine staining,  $\sim 2.0 \times 10^6$  digested uterine, blood or bone marrow cells were immediately fixed and permeabilized using the BD Cytofix/Cytoperm Kit (BD Biosciences) and subjected to cytokine staining according to the manufacturer's protocol. Fixed samples subsequently underwent cell surface staining with fluorochrome-conjugated antibodies as above, minus the 7-AAD staining step. For ROS studies, digested uterine, blood or bone marrow cells were re-suspended in RPMI containing 10% FBS and plated at  $1.0 \times 10^5$  cells/well in a 96-well U-bottom plate either in the presence of 12.5 ng/ml dihydrorhodamine 123 (DHR; Life Technologies), DHR plus 20 ng/ml phorbol 12-myristate 13-acetate (PMA; Sigma-Aldrich), or vehicle control (DMSO). Cells were incubated for 30 min in a 37°C, 5% CO<sub>2</sub> incubator at ambient oxygen. Cells were then washed in FACS buffer, subjected to cell surface staining, and analyzed by flow cytometry as described above.

For fluorescent inhibitor of caspases (FLICA) studies, whole uteri were harvested, fileted open longitudinally, and cut crosswise into 0.5 cm strips. Tissue was then incubated in HBSS containing 0.5% trypsin (Corning) and the caspase 3/7 FLICA substrate (ImmunoChemistry Technologies) for 30 min at 37°C. Tissues were vortexed for 30 s to separate epithelial sheets, and the remaining uterine tissue was discarded. Epithelial cells were further disaggregated by trituration and incubation for 15 min in FACS buffer at 37°C, and analyzed by flow cytometry as above.

For *ex vivo* trypan blue vital staining, whole uteri were dissected and a 1.5 cm long segment from each horn was cut to expose the uterine lumen on both sides. A pipet tip containing 200  $\mu$ l HBSS was inserted into the lumen at one end of the uterine segment and the luminal contents were gently flushed into a 1.7 ml centrifuge tube. The contents were centrifuged and the pellet was then re-suspended in a 100  $\mu$ l solution of 1:1 PBS:0.4% Trypan Blue (Corning cellgro) and incubated at room temperature for 5 min. After washing in PBS, the pellet was then re-suspended in 100  $\mu$ l PBS. Thin layer preparations were made using a Shandon Cytospin 3, and images were taken on a Nikon Eclipse 80i. The cells visualized in this fashion were either single cells or small cell clumps clearly distinct from the contiguous epithelial sheets that could be isolated via the trypsinization protocol described for FLICA staining in the above paragraph.

**Immunofluorescence staining of uterine tissue sections.** Freshly isolated uteri were fixed in 4% paraformaldehyde/PBS overnight (ON) at 4°C. Tissues were then embedded in paraffin and sectioned at 5  $\mu$ m by the NYU School of Medicine Histopathology Core. Some slides were subjected to routine H&E staining. Immunofluorescence staining was performed as previously described (Blaisdell and Erlebacher, 2014). Briefly, deparaffinized slides were placed in methanol containing 3% H<sub>2</sub>O<sub>2</sub> for 20 min. Depending upon the primary antibody (see Supplemental Experimental Tables), the tissues were then subjected to antigen retrieval either by incubation in 1 mg/ml trypsin in H<sub>2</sub>O for 10 min at 37°C or by boiling in 0.01 M citric acid (pH 6.0) for 10-20 min in a pressure cooker. The slides were then blocked in 3% bovine serum albumin (BSA; Sigma-Aldrich) containing 3% donkey serum and 0.4% Triton X-100 (Sigma-Aldrich) for 1 hr at RT, and then incubated overnight at 4°C with primary antibodies diluted in PBS containing 1% BSA and 0.4% Triton X-100. The slides were washed in PBS and the sections were then labeled for 30 min at RT with secondary antibodies (Jackson ImmunoResearch) conjugated either to anti-rat Alexa Fluor 488 (for anti-CK8, anti-CK8 and anti-laminin  $\gamma$ 1 staining) or horseradish peroxidase (HRP; all other primary antibodies aside from Pimonidazole staining) diluted to 5 mg/ml in TNB blocking buffer (PerkinElmer). Specimens labeled with HRP-conjugated secondary antibodies were subjected to tyramide signal amplification (TSA) in PBS containing 1.8  $\mu$ g/ml biotin-tyramide (PerkinElmer) and 0.0015% H<sub>2</sub>O<sub>2</sub> for 5 min at RT. The slides were finally labeled for 30 min at RT with a streptavidin-Alexa Fluor 594 conjugate (Jackson ImmunoResearch) diluted to 5 mg/ml in 1% BSA and counterstained with 4',6-diamidino-2-phenylindole (DAPI) diluted in H<sub>2</sub>O. Pimonidazole staining was performed using a FITC-conjugated primary antibody (Hypoxyprobe) without amplification

and an anti-rat Alexa Fluor 594 secondary to visualize anti-Ly6G-stained cells. All immunofluorescent images were captured using an AxioImager M1 and AxioVision Rel. 4.8 software (Zeiss). Panoramic views were generated by tiling images taken at 100X magnification.

**Tissue immunostaining antibodies/conditions**

| Antigen                      | Abbrev              | Company                                           | Catalog No. | Retrieval | Dilution | TSA* |
|------------------------------|---------------------|---------------------------------------------------|-------------|-----------|----------|------|
| $\alpha 6$                   | $\alpha 6$          | Abcam                                             | ab181551    | Citrate   | 1:1000   | Yes  |
| $\beta 4$                    | $\beta 4$           | Acris                                             | 217381-AP   | Citrate   | 1:100    | Yes  |
| Bromodeoxyuridine            | BrdU                | BD Biosciences                                    | 550803e     | Citrate   | 1:30     | Yes  |
| Cleaved caspase-3            | CC3                 | Cell Signaling Technology                         | 9661        | Trypsin   | 1:1000   | Yes  |
| CXCL5                        | CXCL5               | LifeSpan Biosciences                              | LS-C212192  | Trypsin   | 1:1000   | Yes  |
| Cytokeratin-8                | CK8                 | Univ of Iowa Developmental Studies Hybridoma Bank | Troma-1     | Tryp/Cit  | 1:250    | No   |
| E-cadherin                   | E-cad               | Cell Signaling Technology                         | 3195        | Citrate   | 1:1000   | Yes  |
| HIF-1 $\alpha$               | HIF-1 $\alpha$      | Novus Biologicals                                 | NB100-479B  | Citrate   | 1:1000   | Yes  |
| IL-1 $\beta$                 | IL-1 $\beta$        | R&D Systems                                       | AF-401-NA   | Citrate   | 1:100    | Yes  |
| Laminin $\gamma 1$           | Laminin $\gamma 1$  | Abcam                                             | Ab177792    | Trypsin   | 1:100    | No   |
| Ly6G                         | Ly6G                | BD Biosciences                                    | 551459      | Tryp/Cit  | 1:250    | No   |
| p27 <sup>Kip1</sup>          | p27 <sup>Kip1</sup> | Santa Cruz Biotechnology                          | sc-528      | Citrate   | 1:3000   | Yes  |
| phospho-AKT (ser473)         | pAKT                | Cell Signaling Technology                         | 4060        | Trypsin   | 1:1000   | Yes  |
| phospho-histone H3           | pH3                 | Cell Signaling Technology                         | 9701        | Citrate   | 1:1000   | Yes  |
| phospho-HP1 $\gamma$ (ser83) | pHP1 $\gamma$       | Abcam                                             | ab45270     | Citrate   | 1:500    | Yes  |
| Pimonidazole adducts         | PIM                 | Hypoxypore, Inc.                                  | HP2-100kit  | Citrate   | 1:100    | No   |
| Smooth muscle actin          | SMA                 | Novus Biologicals                                 | NB300-978   | Citrate   | 1:30     | Yes  |
| Trop-2                       | Trop2               | R&D Systems                                       | BAF1122     | Tryp/Cit  | 1:1000   | Yes  |

\*TSA: tyramide signal amplification

**Image manipulation and analysis.** Exported TIF files were manipulated in Adobe Photoshop first by applying the curves command to each channel to remove ambient background fluorescence with a linear mapping applied to remaining pixel values. The brightness and contrast of each channel was then optimized for display. All manipulations were applied evenly across an image, and all manipulations were applied identically across a set of images when staining intensity *per se* was an important feature (as opposed to mere visualization of a cell population or structure). Exposure times in these cases were also held constant. For low magnification images of uterine sections, the maximum filter of ImageJ was applied to the green Ly6G-stained channel in order to render PMNs visible. The DAPI (blue) channel was also blurred in some of these cases to improve image quality at low magnification. Since PIM staining visualized hypoxic areas as green and PMNs as red, we inverted these colors in Photoshop for consistency.

For the histomorphometric determination of cross-sectional tumor areas and tumor distributions, Adobe Photoshop was first used to demarcate the E-cad<sup>+</sup> epithelium in cross-sections of PRPL uteri or pAKT<sup>+</sup> epithelium in longitudinal sections of PL-AdCre uteri, and to further distinguish intact from sloughed epithelium. Sloughed regions were easily identified by eye because they were located within the lumen and had a macerated appearance. For each



sample, ImageJ was then used to determine the cross-sectional areas of the two types of epithelia (intact versus sloughed). For PRPL lesions, this method was also used to determine total, endometrial, myometrial, and luminal cross-sectional areas. SMA co-stain was used to delimit myometrium from endometrium. Derived parameters (percentages) were then averaged across the multiple cross-sections analyzed for each mouse. For PRPL uteri, at least 3 complete and intact cross-sections were analyzed for each 12-week-old mouse; at least 2 complete and intact cross-sections were analyzed for each 4-week-old mouse. For PL-AdCre uteri, total pAKT<sup>+</sup> areas (intact and sloughed) were summed from staining of one 5  $\mu$ m section, which covered the entire length of the uterus.

For the determination of tumor cell BrdU and pH3 labeling indices, the epithelium of each image was first isolated by deleting non-epithelial (CK8<sup>-</sup>) structures. For the determination of BrdU labeling indices, intraepithelial PMNs were identified (and then deleted) by virtue of their compact, brightly DAPI-positive nuclei, and BrdU<sup>+</sup> and total epithelial cells were then hand counted from two 20X images per mouse. At least 1500 cells were scored per mouse. Epithelial nuclear densities were also calculated in relationship to the total epithelial cross-sectional area analyzed, as determined in ImageJ. For the determination of pH3 labeling indices, the number of hand-counted positive cells over 3-5 10X images per mouse was first normalized to the total analyzed epithelial cross-sectional area, again as determined in ImageJ, and this ratio was then converted into a labeling index using the mean epithelial nuclear density for each respective mouse group that was determined as part of the BrdU analysis and shown in Figure S3A.

For the determination of percent  $\alpha$ 6<sup>+</sup> or  $\beta$ 4<sup>+</sup> basolateral epithelial BMZ surface, sections were additionally co-stained with CK8 and DAPI to identify the interface between the epithelium and the stroma, and were analyzed by a standard grid counting method (Weibel, 1969) in Adobe Photoshop. All sections were captured with the same exposure times and manipulated identically in Adobe Photoshop to increase brightness. Data was summated over four 20X random images per uteri from PRPL, PRPL-*Csf3r*<sup>-/-</sup> and PRPL-*Myd88*<sup>-/-</sup> mice; data from at least two images per uteri were summated for PL mice.

For determination of PMN density within PIM<sup>-</sup> and PIM<sup>+</sup> glands in 4-week PRPL lesions, and within pAKT<sup>+</sup> PL-AdCre lesions, the lasso tool and measurement log in Adobe Photoshop were used to delineate and calculate tissue area, respectively. Number of PMNs within a given area was then determined by hand using the count tool. For PRPL lesions, at least 5 20X images from each sample were analyzed, each of which contained from 4-25 distinct glands. Boundaries of uterine glands were easily visualized by increasing the brightness of the green channel (anti-Ly6G). PIM<sup>+</sup> and PIM<sup>-</sup> glands were distinguished by eye, and each sample

contained at least 15 total PIM<sup>+</sup> and at least 15 total PIM<sup>-</sup> glands. For PL-AdCre uteri, all pAKT<sup>+</sup> lesions from a given section were photographed and analyzed. Each sample had at least 9 distinct pAKT<sup>+</sup> lesions. Final PMN density for each PRPL and PL-AdCre specimen was determined from summated values for counted PMNs within PIM<sup>+</sup>, PIM<sup>-</sup> or pAKT<sup>+</sup> areas divided by respective summated areas.

### Quantitative real-time PCR (qRT-PCR) and whole transcriptome sequencing (RNA-seq).

Mouse whole uterine RNA was isolated by homogenization of 1-5 mg tissue in 1 ml Trizol (Life Technologies), followed by chloroform extraction and isopropanol precipitation. RNA from human EC cell lines was isolated using an RNeasy Mini Kit (Qiagen) by following the manufacturer's protocol. cDNA was generated from 1 µg total RNA with an iScript cDNA Synthesis Kit (Bio-Rad), and 3.3 ng cDNA was subjected to qPCR using a cocktail containing 1x EvaGreen dye (Biotium) and 100 nM each of forward and reverse primers (see Supplemental Experimental Tables). Samples were run on an Applied Biosystems StepOnePlus Real-Time PCR System (Life Technologies).

#### qRT-PCR primers

| Gene                  | Forward Primer           | Reverse Primer       |
|-----------------------|--------------------------|----------------------|
| <b>MOUSE</b>          |                          |                      |
| <i>Actb</i> (β-actin) | GCTCTGGCTCCTAGCACCAT     | GCCACCGATCCACACAGAGT |
| <i>Ankrd37</i>        | TGGAGACAGGAGCATCAGTG     | CCCAAGACATCCTGTTGGTT |
| <i>Car9</i> (CAIX)    | GCGCTAAGCAGCTCCATACT     | CAGCAAAGAGAAGGCCAAAC |
| <i>Ccl20</i>          | CGACTGTTGCTCTCGTACA      | AGGAGGTTACAGCCCTTTT  |
| <i>Cxcl1</i>          | CAAACCGAAGTCATAGCCACA    | ACCAGACAGGTGCCATCAG  |
| <i>Cxcl2</i>          | CAGGCTACAGGGGCTGTT       | CTTCAGGGTCAAGGCCAACT |
| <i>Cxcl5</i>          | GAAAATATTGGGCAGTGACAAAAA | CCGTTCTTCCACTGCGAG   |
| <i>Cxcr2</i>          | GCTCACAAACAGCGTCGTAG     | AGGTTCTCTGAGTGGCATGG |
| <i>Ier3</i>           | TCTGGTCCCAGAAATTTTAC     | GGACCACTCGAGGGTAGAGC |
| <i>Il1a</i>           | GCTGAAGGAGTTGCCAGAAA     | GTGCACCCGACTTTGTTCTT |
| <i>Il1b</i>           | TTTTGACAGTGATGAGAATGACCT | AGCTTCTCCACAGCCACAAT |
| <i>Il18</i>           | ACAACCTTTGGCCGACTTCAC    | GGTTCACTGGCACTTTGAT  |
| <i>Il6</i>            | CCGGAGAGGAGACTTCACAG     | CAGAATTGCCATTGCACAAC |
| <i>Lgals3</i>         | CAACGCAAACAGGATTGTTCTA   | TGAATGGTTTGCCACTCTCA |
| <i>Nampt</i>          | CCACCGACTCGTACAAGGTT     | ACTTCTTTGGCCTCCTGGAT |
| <i>Pkm</i>            | GTCCGCAGGTTTGATGAGAT     | AATCTCAATGCCCAGGTCAC |
| <i>Plau</i> (uPA)     | ACTGCAGGAACCCTGACAAC     | TCAGTGAATTCTCCCCAAC  |
| <i>Ptgs2</i> (COX-2)  | GGCCATGGAGTGGACTTAAA     | GGTTCTCAGGGATGTGAGGA |
| <i>S100a8</i>         | GGAAATCACCATGCCCTCTA     | TGGCTGTCTTTGTGAGATGC |
| <i>S100a9</i>         | CAGCATAACCACCATCATCG     | GTCCTGGTTTGTGTCCAGGT |
| <i>Slc2a1</i> (GLUT1) | AAAGAAGAGGGTCGGCAGAT     | ACAGCGACACCACAGTGAAG |
| <i>Tnf</i>            | CAGACCCTCACACTCAGATCAT   | GTGGGTGAGGAGCACGTAGT |
| <b>HUMAN</b>          |                          |                      |
| <i>ACTB</i> (β-actin) | GGACTTCGAGCAAGAGATGG     | AGCACTGTGTTGGCGTACAG |
| <i>CCL20</i>          | GCAAGCAACTTGACTGCTG      | CGTGTGAAGCCCACAATAAA |
| <i>IL8</i>            | GTGTGAAGGTGCAGTTTTGC     | AAATTTGGGGTGGAAAGGTT |
| <i>PTGS2</i> (COX-2)  | CTGCTCAACACCGGAATTTT     | GAGAAGGCTTCCCAGCTTTT |
| <i>SLC2A1</i> (GLUT1) | GGGCCAAGAGTGTGCTAAAG     | TGCCGACTCTCTTCTTCAT  |

For RNA-seq, uterine epithelial cells (CD45<sup>-</sup>EpCAM<sup>+</sup>; see Figure S3D) were sorted on a BC MoFlo XDP (Beckman Coulter) at the NYU School of Medicine Flow Cytometry and Cell Sorting Center. RNA was isolated using an RNeasy Mini Kit. Samples were analyzed on an Illumina HiSeq at the NYU School of Medicine Genome Technology Center. Genes with significantly different expression based on a false discovery rate-adjusted p value ( $p_{adj} < 0.05$ ) in PRPL and PRPL-*Csf3r*<sup>-/-</sup> tumor cells were clustered into separate groups based on whether expression was higher in PRPL or PRPL-*Csf3r*<sup>-/-</sup> cells. Gene set enrichment analysis (GSEA) of each group was then performed using the Database for Annotation, Visualization and Integrated Discovery (DAVID; Broad Institute; [david.abcc.ncifcrf.gov/tools.jsp](http://david.abcc.ncifcrf.gov/tools.jsp)). Gene Ontology (GO) Terms with  $p < 0.001$  are depicted in Figure 3B. Normalized data for individual genes are depicted in Figures 5E and S6H.

## SUPPLEMENTAL REFERENCES

Blaisdell, A., and Erlebacher, A. (2014). Immunofluorescence and Immunohistochemistry. In *The Guide to Investigation of Mouse Pregnancy*, B. Adamson, A. Croy, A.T. Yamada, F.J. DeMayo, and S. Lee, eds. (Boston: Academic Press), pp. 577-589.

Christopher, M. J., Rao, M., Liu, F., Woloszynek, J. R., and Link, D. C. (2011). Expression of the G-CSF receptor in monocytic cells is sufficient to mediate hematopoietic progenitor mobilization by G-CSF in mice. *J Exp Med* 208, 251-260.

Collins, M. K., Tay, C. S., and Erlebacher, A. (2009). Dendritic cell entrapment within the pregnant uterus inhibits immune surveillance of the maternal/fetal interface in mice. *J Clin Invest* 119, 2062-2073.

Nowakowski, R. S., Lewin, S. B., and Miller, M. W. (1989). Bromodeoxyuridine immunohistochemical determination of the lengths of the cell cycle and the DNA-synthetic phase for an anatomically defined population. *J Neurocytol* 18, 311-318.

Reutershan, J., Morris, M. A., Burcin, T. L., Smith, D. F., Chang, D., Saprito, M. S., and Ley, K. (2006). Critical role of endothelial CXCR2 in LPS-induced neutrophil migration into the lung. *J Clin Invest* 116, 695-702.

Weibel, E. R. (1969). Stereological principles for morphometry in electron microscopic cytology. *International review of cytology* 26, 235-302.
